# Supplementary material for: Drugging Hijacked Kinase Pathways in Pediatric Oncology: Opportunities and Current Scenario
Source: MDPI journal article supplement (doi:10.3390/pharmaceutics15020664), 2023-02-16
Supplement: s1 [file s1]

## Supplementary Figures

### DRUGGING HIJACKED KINASE PATHWAYS IN PEDIATRIC ONCOLOGY: OPPORTUNITIES AND CURRENT SCENARIO

Marina Ferreira Candido MSc<sup>1</sup>, Mariana Medeiros MSc<sup>2</sup>, Luciana Chain Veronez PhD<sup>3</sup>,  
David Bastos BSc<sup>4</sup>, Karla Laissa Oliveira BSc<sup>4</sup>; Julia Alejandra Pezuk PhD<sup>5</sup>, Elvis Terci  
Valera PhD<sup>3</sup> and María Sol Brassesco PhD<sup>5\*</sup>

<sup>1</sup>Department of Genetics, Ribeirão Preto Medical School, University of São Paulo, Ribeirão Preto, São Paulo, Brazil.

<sup>2</sup>Regional Blood Center, University of São Paulo, São Paulo, Brazil.

<sup>3</sup>Department of Pediatrics, Ribeirão Preto Medical School, University of São Paulo, Ribeirão Preto, São Paulo, Brazil.

<sup>4</sup>Department of Biology, Faculty of Philosophy, Sciences and Letters at Ribeirão Preto, University of São Paulo, Brazil.

<sup>5</sup>Anhanguera University of São Paulo, UNIAN/SP, Brazil.

\*Corresponding author: María Sol Brassesco. Departamento de Biologia, FFCLRP-USP. Av. Bandeirantes, 3900. Bairro Monte Alegre. CEP 14040-901. Ribeirão Preto – SP. Brazil. Phone: +55 16 33159144, fax: +55 16 33154886, e-mail: [solbrassesco@usp.br](mailto:solbrassesco@usp.br), [orcid.org/0000-0003-4447-784X](https://orcid.org/0000-0003-4447-784X)

*Adapted from:* Page MJ, McKenzie JE, Bossuyt PM, Boutron I, Hoffmann TC, Mulrow CD, et al. The PRISMA 2020 statement: an updated guideline for reporting systematic reviews. *BMJ* 2021;372:n71. doi: 10.1136/bmj.n71. For more information, visit: <http://www.prisma-statement.org/>

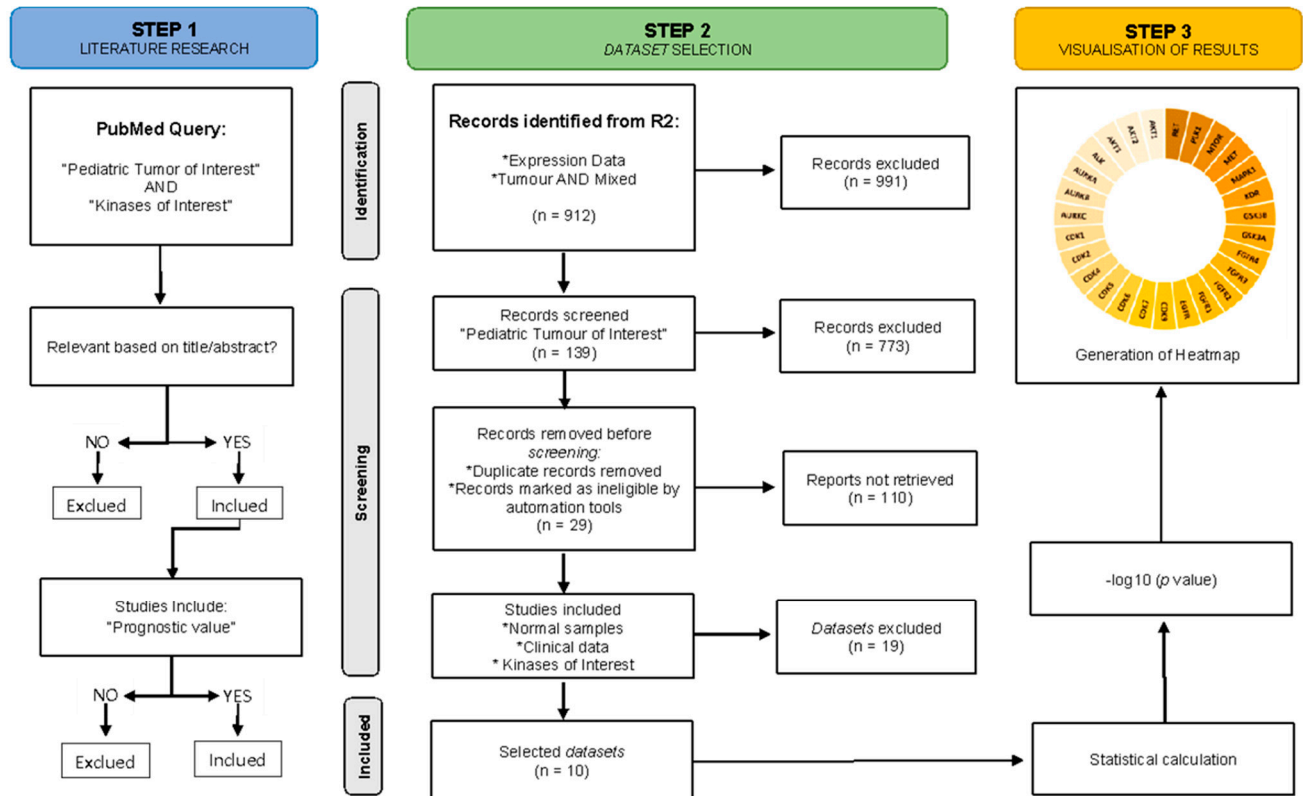

**Supplementary Figure S2:** Flowchart representing kinases of interest analysis in cell line dependency score and the identification of inhibitors, preclinical studies and clinical test describing the number originally identified, included and excluded, and the reasons for exclusions.

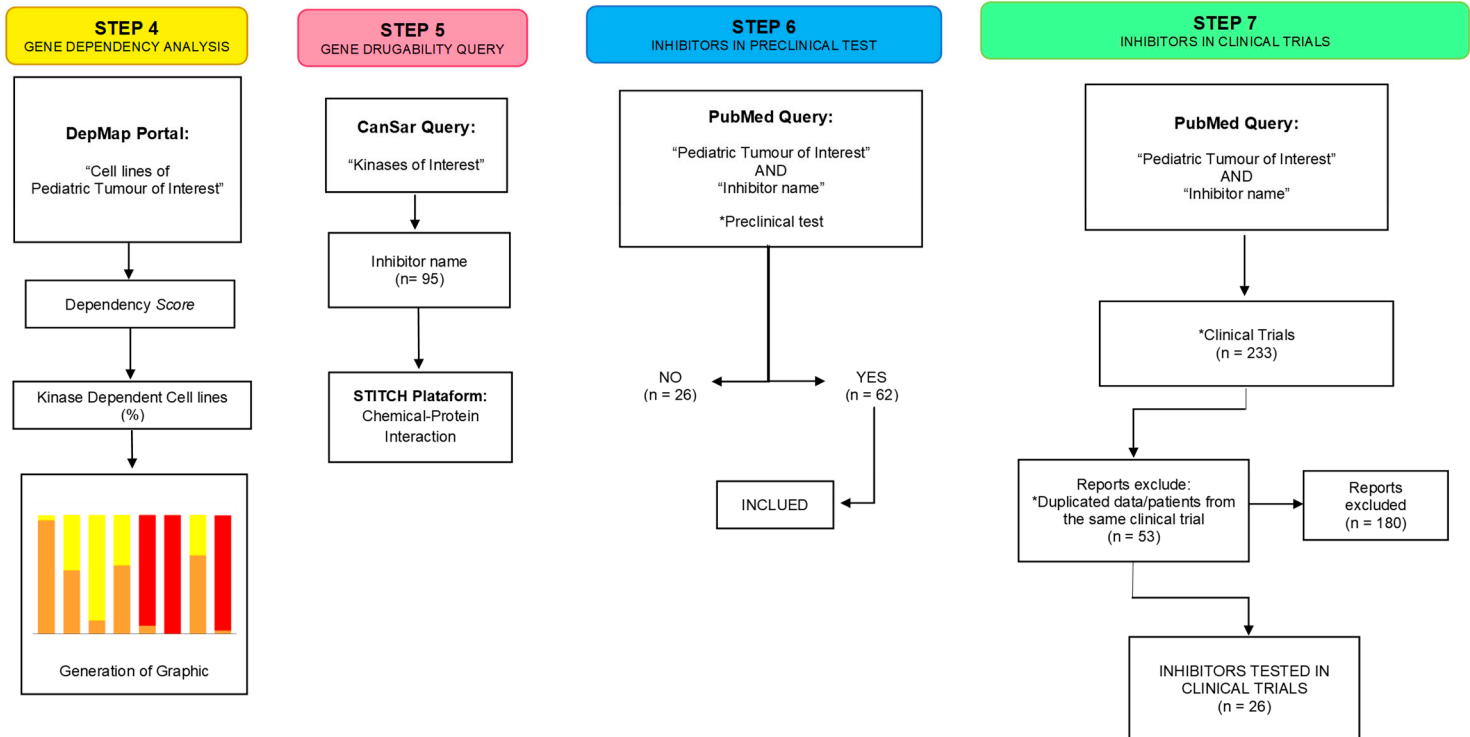

*Adapted from:* Page MJ, McKenzie JE, Bossuyt PM, Boutron I, Hoffmann TC, Mulrow CD, et al. The PRISMA 2020 statement: an updated guideline for reporting systematic reviews. *BMJ* 2021;372:n71. doi: 10.1136/bmj.n71. For more information, visit: <http://www.prisma-statement.org/>

**Supplementary Figure S3:** Schematic illustrations of kinases druggability identified by the CanSAR database in the other kinase families, including the total number of compounds with predicted interaction capacity with each kinase, as well as FDA-approved drugs, and clinical candidates. Interaction networks of kinase inhibitors and associated binding proteins according to STITCH ('search tool for interactions of chemicals'). Compounds are represented as pill-shaped nodes, while proteins are shown as spheres. Small nodes represent proteins of unknown 3D structures, while large nodes show proteins with known or predicted structures. Nodes that are associated to each other are linked by an edge: thicker lines represent stronger binding affinities. Networks were constructed considering a minimum required interaction score of 0.700, and based on associations reported in Curated Databases (gray lines), or on both Databases and Experimental/Biochemical Data (green lines). Purple lines represent functional links between proteins.

PI3K/AKT/mTOR inhibitors

Compounds

Clinical promise

FDA approved

|       |      |    |   |
|-------|------|----|---|
| mTOR  | 6188 | 15 | 2 |
| GSK3A | 3291 | 0  | 0 |
| GSK3B | 7610 | 2  | 0 |
| AKT1  | 6134 | 4  | 0 |
| AKT2  | 2756 | 0  | 0 |
| AKT3  | 1622 | 0  | 0 |

A network diagram illustrating the interactions between various proteins and drugs in the PI3K/AKT/mTOR pathway. Proteins shown include GSK3B, AKT1, AKT2, PIK3CA, PIK3CG, MTOR, EIF4E, AZD8055, OSI-027, INK-128, CPT1A, CPT2, CYP2D6, perhexiline, PKI-179, PKI-587, Apitolisib, MK-2206 dihydr., LY2090314, GDC-0068, tricinibine, NVP-BEZ235, XL765, NVP-BGT226, everolimus, and PDGFRB. Drugs are represented by colored circles, and proteins by green circles. Lines indicate interactions between them.

MAPK inhibitors

Compounds

Clinical promise

FDA approved

|       |      |   |   |
|-------|------|---|---|
| MAPK1 | 7872 | 0 | 0 |
| MAPK3 | 2718 | 0 | 0 |
| RAF1  | 4764 | 3 | 4 |
| PLK1  | 3242 | 5 | 0 |

A network diagram illustrating the interactions between various proteins and drugs in the MAPK pathway. Proteins shown include FLT4, FLT1, PDGFRA, PDGFRB, KDR, BRAF, RAF1, RET, KIT, FLT3, sorafenib, regorafenib, vemurafenib, and dabrafenib. Drugs are represented by colored circles, and proteins by green circles. Lines indicate interactions between them.

Cell cycle inhibitors

Compounds

Clinical promise

FDA approved

|       |      |    |   |
|-------|------|----|---|
| PLK1  | 3242 | 5  | 0 |
| AURKA | 5927 | 0  | 0 |
| AURKB | 4558 | 0  | 0 |
| AURKC | 1167 | 0  | 0 |
| CDK1  | 4509 | 8  | 0 |
| CDK2  | 9410 | 12 | 0 |
| CDK4  | 4244 | 7  | 4 |
| CDK5  | 3829 | 4  | 0 |
| CDK6  | 4244 | 1  | 4 |
| CDK7  | 1929 | 4  | 0 |
| CDK9  | 4973 | 7  | 0 |

A network diagram illustrating the interactions between various proteins and drugs in the cell cycle pathway. Proteins shown include CDK7, CDK6, CDK4, CDK5, CDK2, CDK1, PLK1, CHEK1, PDPK1, Sns-032, AT7519, roscovitine, 7-hydroxystaur., y/benzamide, NMS-P937, volasertib, BI 2536, GSK461364A, milciclib, palbociclib, SU9516, SB1317/TG02, Ag-24322, and terameprocol. Drugs are represented by colored circles, and proteins by green circles. Lines indicate interactions between them.
