# Supplementary material for: Drugging Hijacked Kinase Pathways in Pediatric Oncology: Opportunities and Current Scenario
Source: Pharmaceutics. 2023 Feb 16;15(2):664. doi: 10.3390/pharmaceutics15020664 (PMC9966033; doi:10.3390/pharmaceutics15020664)
Supplement: Supplementary file 1 [file pharmaceutics-15-00664-s001.zip]

Archive with 6 entries (6 files):
- Supplementary Figures.pdf
- Supplementary Table S1 - Differential expression of kinases (pediatric tumors vs normal tissue).xlsx
- Supplementary Table S2 - Knase expression and clinical features.xlsx
- Supplementary Table S3- DepMap scores.xlsx
- Supplementary Table S4 - preclinical data.xlsx
- Supplementary Table S5 - Clinical trials.xlsx
