# Supplementary material for: Drugging Hijacked Kinase Pathways in Pediatric Oncology: Opportunities and Current Scenario
Source: Pharmaceutics. 2023 Feb 16;15(2):664. doi: 10.3390/pharmaceutics15020664 (PMC9966033; doi:10.3390/pharmaceutics15020664)
Supplement: Supplementary file 1 [file pharmaceutics-15-00664-s001.zip › Supplementary Table S1 - Differential expression of kinases (pediatric tumors vs normal tissue).xlsx]

## Sheet: DATASETS
Supplementary table S1: p-vaules indicating kinase differential expression in pediatric tumors (samples vs normal tissue) obtained through the analysis of publicably available data on the R2 Genomics Analysis and Visualization Platform. non-significant values are painted in grey.
	TUMOR TYPE
Gene	EWS	EPN	MB	NB	PA	OS	RB	RMS
AKT1		0.0028	0.0041					<0.0001
AKT2	<0.0001							<0.0001
AKT3		0.0194			0.005	0.0007	0.0497	<0.0001
ALK	0.0009			0.0002	0.0038		0.0179	0.0228
AURKA	0.0023	0.0194	<0.0001			0.0026	0.0002	<0.0001
AURKB	<0.0001		0.0051	0.0085	0.0012	0.0464	<0.0001	<0.0001
AURKC				0.0128				<0.0001
CDK1	<0.0001	0.0002	<0.0001				0.0002
CDK2	0.0043	0.0005	0.0001				0.0414
CDK4	<0.0001	0.0002	<0.0001					<0.0001
CDK5	<0.0001				<0.0001			<0.0001
CDK6			0.0015	0.0005		0.0118	0.0035	<0.0001
CDK7		0.0028	0.0019	0.012		0.0444		<0.0001
CDK9	0.0041					0.0007	0.034	<0.0001
EGFR	0.0034	0.046			<0.0001	0.0118	0.0063
FGFR1	<0.0001	0.0194	0.0006		0.005	0.0007		<0.0001
FGFR2	0.0091		0.0131	0.0003	0.0197	0.0176	0.0139	0.0358
FGFR3	<0.0001		0.0011					<0.0001
FGFR4	<0.0001		0.0185		0.024	0.0118		<0.0001
GSK3A	<0.0001					0.0248		<0.0001
GSK3B	<0.0001							<0.0001
KDR		0.0098					<0.0001
MAPK1			0.0006		0.0038			0.0004
MET		0.0264		0.0222			0.0023
MTOR								<0.0001
PLK1								<0.0001
RET								<0.0001
TUMOUR	DATASETS USED								ID	REFERENCE
EWS	Mixed Ewing Sarcoma - Savola - 117 - MAS5.0 - u133p2;								GSE17679	doi:10.5402/2011/168712
EPN	Tumor Medulloblastoma Ependymoma - denBoer - 51 - MAS5.0 - u133p2								GSE74195	doi: 10.1215/15228517-2008-032)
MB
NB	Tumor Neuroblastoma - Lavarino - 23 - rma_sketch - u219								GSE54720	doi: 10.2217/epi.15.49
PA	Tumor Pediatric Brain - Sheer - 73 - custom - ilmnht12v3								GSE42656	doi: 10.1158/0008-5472.CAN-13-1299
OS	Mixed Osteosarcoma - Aqeilan - 18 - MAS5.0 - u133p2								-	doi: 10.1158/0008-5472.CAN-11-2663
RB	Tumor Retinoblastoma - Chapeaublanc - 66 - MAS5.0 - u133p2								GSE58780	-
RMS	Mixed Rhabdomyosarcoma - Schafer Welle - 56 - MAS5.0 - u133a								GSE15349	doi:10.1152/physiolgenomics.00054.2009
									-	doi: 10.1158/0008-5472.CAN-04-0844

## Sheet: PROBES
	TUMOR TYPE
Gene	EWS	EPN	MB	NB	PA	OS	RB	RMS
AKT1	207163_s_at	207163_s_at	207163_s_at	11716087_s_at	ILMN_2410909	207163_s_at	207163_s_at	207163_s_at
AKT2	225471_s_at	225471_s_at	225471_s_at	11746138_s_at	ILMN_1743347	225471_s_at	225471_s_at	203809_s_at
AKT3	212609_s_at	212609_s_at	212609_s_at	11759289_at	ILMN_2325612	212609_s_at	212607_at	212607_at
ALK	208212_s_at	208211_s_at	208211_s_at	11750678_a_at	ILMN_1753135	208212_s_at	208212_s_at	208212_s_at
AURKA	204092_s_at	204092_s_at	204092_s_at	11718943_a_at	ILMN_1680955	208079_s_at	208079_s_at	204092_s_at
AURKB	209464_at	209464_at	209464_at	11720203_a_at	ILMN_1684217	209464_at	209464_at	209464_at
AURKC	211107_s_at	211107_s_at	211107_s_at	11731235_a_at	ILMN_2350296	211107_s_at	211107_s_at	211107_s_at
CDK1	203213_at	203213_at	203213_at	11726617_s_at	ILMN_1754499	203213_at	203213_at	203213_at
CDK2	204252_at	204252_at	204252_at	11720781_a_at	ILMN_1665559	204252_at	204252_at	204252_at
CDK4	202246_s_at	202246_s_at	202246_s_at	11753378_a_at	ILMN_1689001	202246_s_at	202246_s_at	202246_s_at
CDK5	204247_s_at	204247_s_at	204247_s_at	11754938_a_at	ILMN_1781987	204247_s_at	204247_s_at	204247_s_at
CDK6	224851_at	224851_at	224851_at	11723243_at	ILMN_1802615	224847_at	224847_at	207143_at
CDK7	211297_s_at	211297_s_at	211297_s_at	11717845_a_at	ILMN_1778917	211297_s_at	211297_s_at	211297_s_at
CDK9	203198_at	203198_at	203198_at	11720660_s_at	ILMN_1747556	203198_at	203198_at	203198_at
EGFR	201983_s_at	201983_s_at	201983_s_at	11725103_s_at	ILMN_1798975	201983_s_at	201983_s_at	201983_s_at
FGFR1	211535_s_at	211535_s_at	211535_s_at	11727301_a_at	ILMN_2398261	211535_s_at	215404_x_at	211535_s_at
FGFR2	203638_s_at	203638_s_at	203638_s_at	11740394_a_at	ILMN_1682270	208228_s_at	203638_s_at	203638_s_at
FGFR3	204379_s_at	204379_s_at	204379_s_at	11755786_a_at	ILMN_1723123	204379_s_at	204379_s_at	204379_s_at
FGFR4	204579_at	204579_at	204579_at	11744657_x_at	ILMN_2410713	204579_at	1554962_a_at	204579_at
GSK3A	632_at	632_at	632_at	11724373_a_at	ILMN_1769031	632_at	632_at	632_at
GSK3B	226191_at	226191_at	226191_at	11754361_s_at	ILMN_1757569	226191_at	226191_at	209945_s_at
KDR	203934_at	203934_at	203934_at	11739315_at	ILMN_1779376	203934_at	203934_at	203934_at
MAPK1	224621_at	224621_at	224621_at	11715843_at	ILMN_1686405	224621_at	224621_at	212271_at
MET	203510_at	203510_at	203510_at	11716408_a_at	ILMN_1706677	203510_at	203510_at	203510_at
MTOR	202288_at	202288_at	202288_at	11716134_a_at	ILMN_1715175	202288_at	202288_at	202288_at
PLK1	202240_at	202240_at	202240_at	11716726_a_at	ILMN_1736176	202240_at	202240_at	202240_at
RET	211421_s_at	205879_x_at	205879_x_at	11729917_at	ILMN_1655610	211421_s_at	211421_s_at	205879_x_at
