# Supplementary material for: Drugging Hijacked Kinase Pathways in Pediatric Oncology: Opportunities and Current Scenario
Source: Pharmaceutics. 2023 Feb 16;15(2):664. doi: 10.3390/pharmaceutics15020664 (PMC9966033; doi:10.3390/pharmaceutics15020664)
Supplement: Supplementary file 1 [file pharmaceutics-15-00664-s001.zip › Supplementary Table S2 - Knase expression and clinical features.xlsx]

## Sheet: DATASETS
Supplementary table S2: p-values of associations between kinase expression and clinical features in pediatric tumors. Data obtained through the analysis of publicly available data on the R2 Genomics Analysis and Visualization Platform. Event data like presence of metastasis and death were analyzed in relation to overexpressed (red) and downregulated expression (blue) of the kinase of interest. Ov…
	TUMOR TYPE
	EWS		MB		NB		OS
Gene	Metastasis	Death	Death	Molecular subgroup	MYC status	Death	Metastasis	Death	Huvos grade
AKT1				0.0001	<0.0001	<0.0001
AKT2		0.0467		0.0002	<0.0001	0.0002							LEGEND
AKT3			0.0002	<0.0001	<0.0001	0.01	0.0045	0.0415					MB Molecular subgroup
ALK			0.0001	<0.0001	<0.0001	<0.0001		0.0012					Shh
AURKA	0.002	0.0266	0.0001	<0.0001	<0.0001	<0.0001			0.0348				Wnt
AURKB		0.0104		<0.0001	<0.0001	<0.0001			0.0452				Group 3
AURKC				<0.0001	<0.0001	0.0306							Group 4
CDK1	0.0058			<0.0001	<0.0001	<0.0001							NB MYC status
CDK2	0.0053	0.0079		<0.0001	<0.0001	<0.0001			0.0352				Amp
CDK4	0.0132	0.0002		<0.0001	<0.0001	<0.0001							Not amp
CDK5		0.003		<0.0001	0.0006				0.0032				Metastasis and Death
CDK6				<0.0001		0.0003							Overexpressed
CDK7				<0.0001	<0.0001	<0.0001			0.0465				Downexpressed
CDK9			0.0093	<0.0001	<0.0001	<0.0001							Huvos Grade
EGFR				<0.0001	<0.0001	0.0036							Grau IV
FGFR1			0.0001	<0.0001
FGFR2	0.0132			<0.0001	0.0004	<0.0001		0.0158
FGFR3			0.0499	<0.0001				<0.0001
FGFR4	0.0058		0.0205	<0.0001	<0.0001	<0.0001
GSK3A		0.023		<0.0001		0.0023
GSK3B			0.0201	<0.0001
KDR				0.0013	<0.0001	<0.0001		0.0031
MAPK1				<0.0001	<0.0001	<0.0001
MET	<0.0001			<0.0001		<0.0001
MTOR	0.002			<0.0001	<0.0001	<0.0001
PLK1		0.0153	<0.0001	0.0002	<0.0001	<0.0001			0.0198
RET	0.0004			<0.0001	<0.0001	<0.0001
TUMOUR	DATASETS USED						ID	REFERENCE
EWS	Mixed Ewing Sarcoma - Savola - 117 - MAS5.0 - u133p2						GSE17679	doi:10.5402/2011/168712
MB	Tumor Medulloblastoma - Cavalli - 763 - rma_sketch - hugene11t						GSE85217	doi:10.1016/j.ccell.2017.05.005
NB	Tumor Neuroblastoma - SEQC - 498 - RPM - seqcnb1						GSE62564	doi:10.1038/nbt.3001; doi:10.1038/nbt.2957; doi: 10.1038/ncomms6125; doi:10.1186/s13059-014-0523-y
OS	Mixed Osteosarcoma (Mesenchymal) - Kuijjer - 127 - vst - ilmnhwg6v2						GSE42352	doi: 10.1002/gcc.21956

## Sheet: PROBES
	TUMOR TYPE
Gene	EWS	MB	NB	OS
AKT1	207163_s_at	7981494	NM_005163	ILMN_1784157
AKT2	225471_s_at	8036840	NM_001626	ILMN_1743347
AKT3	212609_s_at	7925531	NM_005465	ILMN_1757130
ALK	208212_s_at	8051241	NM_004304	ILMN_1753135
AURKA	204092_s_at	8067167	NM_198433	ILMN_1680955
AURKB	209464_at	8012403	NM_004217	ILMN_1684217
AURKC	211107_s_at	8031700	NM_001015878	ILMN_1721333
CDK1	203213_at	7927710	NM_001786	ILMN_1754499
CDK2	204252_at	7956076	NM_001798	ILMN_1665559
CDK4	202246_s_at	7964522	NM_000075	ILMN_1689001
CDK5	204247_s_at	8143850	NM_004935	ILMN_1754375
CDK6	224851_at	8140955	NM_001259	ILMN_1802615
CDK7	211297_s_at	8105862	NM_001799	ILMN_1778917
CDK9	203198_at	8158112	NM_001261	ILMN_1729684
EGFR	201983_s_at	8132860	NM_005228	ILMN_1798975
FGFR1	211535_s_at	8150318	NM_015850	ILMN_1796229
FGFR2	203638_s_at	7936734	NM_000141	ILMN_1682270
FGFR3	204379_s_at	8093518	NM_000142	ILMN_1723123
FGFR4	204579_at	8110265	NM_213647	ILMN_1730355
GSK3A	632_at	8037152	NM_019884	ILMN_1769031
GSK3B	226191_at	8089801	NM_002093	ILMN_1757569
KDR	203934_at	8100393	NM_002253	ILMN_1779376
MAPK1	224621_at	8074791	NM_002745	ILMN_1686405
MET	203510_at	8135601	NM_000245	ILMN_1665276
MTOR	202288_at	7912412	NM_004958	ILMN_1715175
PLK1	202240_at	7994109	NM_005030	ILMN_1736176
RET	211421_s_at	7927120	NM_020975	ILMN_1655610
