# Supplementary material for: Drugging Hijacked Kinase Pathways in Pediatric Oncology: Opportunities and Current Scenario
Source: Pharmaceutics. 2023 Feb 16;15(2):664. doi: 10.3390/pharmaceutics15020664 (PMC9966033; doi:10.3390/pharmaceutics15020664)
Supplement: Supplementary file 1 [file pharmaceutics-15-00664-s001.zip › Supplementary Table S3- DepMap scores.xlsx]

## Sheet: EWS
Supplementary table S3: Dependency of tumor cell lines on the indicated kinases retrieved from de DepMap. Scores with negative values denote those cell lines where the given gene is especially important for growth or survival. Red = adult cell lines, Blue = pediatric, and GREY = age not specified
	Dependency scores
Cell line	AURKA	AURKB	AURKC	CDK1	CDK2	CDK4	CDK5	CDK6	CDK7	CDK9	PLK1	AKT1	AKT2	AKT3	GSK3A	GSK3B	MTOR	ALK	EGFR	FGFR1	FGFR2	FGFR3	FGFR4	KDR	MET	RET	MAPK1
A673	-1.59059	-1.66896	-0.0163916	-2.0738	-0.616522	-1.08022	0.0288144	-0.172237	-1.91335	-1.45294	-2.49659	-0.31228	-0.0535433	-0.0519389	0.103996	0.0953233	-1.22694	0.052528	-0.293508	-0.0848987	-0.00558664	0.205329	0.00942533	0.136705	-0.21575	-0.1738	-0.46265
CHLA10	-1.47323	-2.16136	0.0185422	-1.97391	-0.316406	-1.67939	-0.0721253	0.0913656	-2.08859	-1.25376	-2.31219	-0.183284	-0.119401	0.0578616	0.0903029	-0.0911879	-1.45979	0.104597	-0.031411	-0.016592	0.0290923	0.031909	-0.075528	-0.16157	-0.0455428	-0.0118584	-0.262893
COGE352	-1.32317	-2.17263	0.015145	-2.07719	-0.51753	-1.72724	-0.0155413	0.0220184	-2.12396	-1.42943	-2.23848	-0.262712	0.012634	0.134138	0.0530993	-0.00297045	-1.30291	0.0473975	-0.102055	-0.102408	-0.0837034	-0.0153265	0.0381889	-0.205415	-0.0637852	-0.0130894	-0.214487
ES4	-1.48835	-1.92043	0.0642879	-2.0351	-0.343601	-1.24226	-0.2947	-0.26436	-1.5816	-1.13812	-2.06481	-0.00466206	0.0860744	0.220518	-0.000615558	-0.0250711	-0.89842	-0.150847	-0.325139	-0.275155	-0.184518	-0.00805945	-0.113704	-0.154871	-0.110244	-0.0112087	-0.239935
ES5	-1.43942	-2.06348	-0.028605	-2.19186	-0.726695	-1.00001	-0.0387245	-0.130797	-1.66292	-1.2025	-2.51122	-0.11805	-0.0675601	0.0249051	0.14162	0.115721	-1.31063	0.0562115	-0.0708492	0.0510117	0.0593051	0.0029228	0.00716496	-0.2728	-0.131575	-0.0196188	0.0549148
ES8	-1.57995	-2.09811	-0.124968	-2.1136	-0.575985	-0.749417	-0.186082	-0.087888	-2.0788	-1.50663	-2.47489	-0.104745	-0.122473	0.141823	-0.0687408	0.124724	-1.22006	0.0272995	-0.0239867	-0.111281	-0.114561	0.0315693	0.0589752	-0.138826	-0.104654	-0.0674152	-0.195844
EW1	-1.16812	-1.79988	-0.0664312	-1.70196	-0.461893	-1.60072	0.0444296	-0.144951	-2.18673	-1.60689	-1.91391	-0.0642159	-0.0655317	0.248673	0.101105	-0.0151476	-1.07639	-0.0131712	-0.105969	-0.0661967	0.149302	0.0098799	-0.0219409	-0.0356878	0.132339	-0.0252169	-0.0494301
EW16	-1.24574	-1.8144	-0.0663199	-1.90648	-0.432796	-0.521427	-0.087824	-0.184351	-1.92906	-1.62675	-2.06401	-0.16117	0.175404	0.191846	0.0310013	0.0298046	-1.45531	-0.0955084	-0.213595	-0.0359292	-0.023614	-0.0270622	-0.0178648	-0.114875	-0.221304	-0.0321974	-0.0884327
EW22	-1.46271	-2.04244	0.0765798	-2.16523	-0.538326	-1.28062	-0.153594	-0.0680715	-1.65184	-1.06999	-2.21169	-0.0848715	0.0752331	0.133442	0.0733949	0.13918	-1.35645	-0.00895793	-0.0498249	-0.074021	-0.074882	0.0682559	0.016621	-0.046905	-0.0864878	-0.0432169	-0.0872322
EW7	-1.19962	-1.99118	-0.0459711	-0.789709	-0.50617	-1.40972	-0.0767512	-0.119604	-2.09586	-1.29837	-2.16523	-0.01655	-0.0603503	0.0357586	-0.0411746	-0.00916924	-1.19459	-0.0539939	-0.0455909	-0.166429	-0.116335	0.0801399	-0.00845765	-0.0427963	0.0676	-0.0953812	-0.0672872
EW8	-1.5335	-1.86657	-0.139186	-2.05442	-0.743387	-1.02317	-0.013901	-0.215882	-2.03511	-1.35022	-2.32698	-0.0751289	-0.0481824	0.115075	0.115676	-0.076708	-1.38412	0.0727233	-0.140218	0.231122	-0.0222364	-0.0546355	0.0542945	-0.0701882	-0.0734909	-0.161971	-0.00806741
EWS502	-0.913436	-2.00317	-0.0205284	-2.3554	-0.357048	-1.87725	-0.0360049	-0.0484586	-2.05516	-1.40263	-2.24086	-0.310516	-0.145077	0.135387	0.30255	0.00990549	-1.74374	0.0111263	-0.065568	-0.11753	-0.010452	-0.0966773	0.00515399	-0.123515	-0.0786247	-0.130729	-0.171647
MCIXC	-0.654442	-2.41079	0.210544	-2.13413	-0.547055	-0.305202	0.0155329	0.111626	-1.9221	-1.84128	-2.37838	0.0635071	0.00646593	0.28341	0.060485	0.0676902	-1.11763	0.0425342	-0.0219461	-0.114614	0.126868	0.0170224	-0.192705	0.0672776	-0.162135	-0.137481	0.0930876
MHHES1	-1.52523	-2.02423	-0.0356318	-1.92505	-0.504614	-1.19467	-0.147108	-0.0532688	-1.91984	-1.53342	-2.346	-0.122039	-0.0945403	0.17422	0.113586	-0.0509736	-1.18136	0.111524	-0.0645452	-0.187495	-0.00322455	0.0920131	-0.0928122	-0.122755	-0.155297	0.0104516	-0.0974873
RDES	-1.40727	-1.93622	0.0180889	-2.30329	-1.06135	-1.79414	-0.0288124	-0.15264	-1.8451	-1.26662	-2.50188	-0.00303687	0.0446985	0.113878	0.315554	0.260537	-1.42113	-0.0712211	-0.0258187	-0.250597	-0.164597	-0.0763908	0.129851	-0.150553	-0.122908	0.00513766	-0.0198263
SKES1	-1.10484	-2.11588	-0.0528319	-1.72016	-0.501279	-1.05284	0.263101	0.12353	-1.67522	-1.57994	-2.12604	-0.0740346	0.0828986	0.241726	-0.0284921	-0.189199	-1.27062	-0.0473879	-0.0581584	-0.264202	0.0145221	0.0545652	-0.0410667	-0.0951562	-0.0976472	0.0506782	-0.137684
SKNEP1	-1.5459	-1.65987	-0.0387724	-1.99917	-0.624602	-1.2751	-0.0340694	-0.136178	-2.01549	-1.39082	-2.26449	-0.203664	0.0444985	0.101576	0.0563034	0.152241	-1.00163	-0.112945	-0.185324	-0.0463594	0.0380131	-0.172323	0.19046	-0.203396	-0.170597	-0.0122323	-0.192351
SKNMC	-1.23264	-2.12456	0.0227484	-1.88057	-0.892473	-0.305881	-0.252597	-0.137568	-1.84139	-1.37781	-2.48573	-0.196086	-0.135844	0.370753	0.0647845	-0.341968	-0.619686	0.0206347	-0.0406837	-0.185558	0.104611	-0.350934	0.0960012	-0.119235	-0.10771	-0.0854542	-0.00580358
SKPNDW	-1.25327	-1.75273	-0.0760084	-1.93336	-0.849958	-0.467587	0.0328823	-0.0413542	-1.89712	-1.45572	-2.3431	-0.138417	-0.113767	0.140682	-0.0274016	-0.0717516	-0.92634	-0.179339	-0.013952	-0.0790388	0.122247	0.139576	-0.0332073	-0.0461097	0.0721147	-0.0810835	-0.0277023
TC106	-1.4621	-1.64191	-0.0287545	-2.11602	-0.886328	-1.13012	-0.0912752	0.0474004	-2.00965	-1.579	-2.30676	-0.23715	-0.179827	0.19999	0.107591	0.325232	-1.44601	-0.0172225	-0.0663649	-0.207912	-0.092991	0.0515238	0.176025	-0.114701	-0.14332	-0.0613471	-0.336351
TC138	-1.45029	-1.83464	0.133051	-2.04868	-0.621673	-0.816006	-0.000413696	-0.122586	-1.69652	-1.53009	-2.40135	-0.125798	0.156325	0.0565628	0.191356	0.103265	-0.979373	-0.172169	0.0669776	-0.189366	0.305258	-0.116415	0.212502	-0.201937	0.00613877	-0.141865	-0.373415
TC205	-1.32124	-1.82327	0.0700765	-1.82969	-0.250635	-1.21253	-0.0432097	-0.0450252	-2.01235	-1.14037	-2.36207	-0.255325	0.0643564	0.138504	-0.107508	-0.253569	-0.945768	-0.0389484	-0.116484	0.104448	-0.103036	-0.0146776	0.0632505	-0.0186136	-0.0425062	0.0150973	-0.130486
TC32	-1.44125	-2.02655	-0.00744614	-1.80381	-0.654394	-1.004	0.00503554	-0.0620232	-1.75136	-1.48291	-2.23807	-0.0615534	0.0930434	-0.161282	0.166469	0.0723139	-0.599993	-0.0693271	0.0253986	-0.150711	0.0531356	-0.113415	0.0820454	-0.0406309	-0.0744298	-0.0852307	-0.281768
TC71	-1.37832	-1.8276	0.031664	-1.99165	-0.615793	-1.30782	-0.0186162	0.00430432	-1.93798	-1.34638	-2.30088	-0.0569479	-0.0559849	-0.0392611	0.0922171	0.0406334	-1.09397	-0.15306	-0.0660951	-0.1485	-0.0712147	0.00965705	-0.0112919	-0.292909	-0.00203861	-0.20275	-0.159046
Dependent	2	0	16	1	23	6	17	18	0	0	0	23	13	3	6	11	6	14	22	22	14	11	10	22	20	20	22
highly dependent	22	24	0	23	1	18	0	0	24	24	24	0	0	0	0	0	18	0	0	0	0	0	0	0	0	0	0
non-dependent	0	0	8	0	0	0	7	6	0	0	0	1	11	21	18	13	0	10	2	2	10	13	14	2	4	4	2
% Dependent cell lines	8.33333	0	66.6667	4.16667	95.8333	25	70.8333	75	0	0	0	95.8333	54.1667	12.5	25	45.8333	25	58.3333	91.6667	91.6667	58.3333	45.8333	41.6667	91.6667	83.3333	83.3333	91.6667
% Highly dependent cell lines (<-1)	91.6667	100	0	95.8333	4.16667	75	0	0	100	100	100	0	0	0	0	0	75	0	0	0	0	0	0	0	0	0	0
non-dependent cell lines	0	0	33.3333	0	0	0	29.1667	25	0	0	0	4.16667	45.8333	87.5	75	54.1667	0	41.6667	8.33333	8.33333	41.6667	54.1667	58.3333	8.33333	16.6667	16.6667	8.33333

## Sheet: OS
Supplementary table BB: Dependency of tumor cell lines on the indicated kinases retrieved from de DepMap. Scores with negative values mark those cell lines where the given gene is especially important for growth or survival.
	Dependency scores
Cell line	AURKA	AURKB	AURKC	CDK1	CDK2	CDK4	CDK5	CDK6	CDK7	CDK9	PLK1	AKT1	AKT2	AKT3	GSK3A	GSK3B	MTOR	ALK	EGFR	FGFR1	FGFR2	FGFR3	FGFR4	KDR	MET	RET	MAPK1
143B	-1.12676	-2.16794	0.0420233	-1.88983	-0.106683	-0.226485	-0.07098	-0.145778	-1.94099	-1.8073	-2.3165	-0.0563254	-0.0961681	-0.0292279	-0.0303737	-0.200317	-1.16426	-0.0297518	-0.0931536	-0.0199944	0.0516233	0.0652336	-0.0953139	-0.0576271	-0.0585891	0.0637122	-0.0265441
CAL72	-1.70162	-1.42158	0.0871776	-1.84027	-0.973985	-0.93874	0.175602	-0.38021	-1.40638	-1.32116	-2.34056	0.0493972	0.098797	0.0809909	0.168447	-0.196255	-1.00866	-0.192346	-0.0482123	-0.899769	0.137674	0.00891702	-0.0141659	-0.239435	-0.0640029	-0.152969	-0.0524562
G292CLONEA141B1	-0.431373	-2.28881	0.0706782	-1.96168	-1.042	-1.21364	-0.168182	-0.0781316	-1.7615	-1.5465	-2.40495	-0.114316	0.0168711	-0.00420096	0.15895	-0.0285057	-1.30113	0.126628	-0.0281699	-1.24811	-0.143117	-0.062577	0.00279976	-0.147422	-0.165792	-0.0395765	0.00132422
HSOS1	-1.47146	-2.12007	-0.0475717	-2.19562	-0.675797	-0.580361	-0.118649	-1.20824	-1.90502	-1.66864	-2.34862	-0.0719589	-0.0832846	0.0825312	0.0120284	0.0449453	-1.10689	0.0646882	-0.197224	0.0249933	-0.0223726	0.0411684	0.0221019	-0.143208	-0.0622468	-0.233612	-0.111924
HUO9	-1.47594	-1.37506	0.0950872	-1.61715	-1.10239	-0.508431	-0.155112	-0.137648	-1.99604	-1.39371	-2.53263	-0.398294	0.0107388	0.443279	-0.0328033	-0.257506	-0.965398	-0.214189	-0.0275559	-0.151528	0.0657288	0.103219	-0.0887231	0.109626	0.0410936	-0.174392	-0.0308702
MG63	-1.89925	-2.09373	0.0292341	-2.21654	-1.09679	-0.52006	0.040992	-0.698767	-1.31798	-1.39253	-2.35372	-0.222654	-0.0906912	-0.0705184	0.298248	0.00122464	-1.16883	0.0066788	-0.167684	-0.683435	-0.00301993	0.00470343	0.0114444	-0.0760431	-0.110318	0.0736441	0.00305497
OS252	-1.60107	-1.74821	0.0797922	-2.00543	-1.08889	-0.592639	-0.0345419	0.0580641	-1.76551	-1.45517	-2.35626	-0.199737	0.0843532	-0.0238074	0.057803	0.041917	-1.06563	-0.0595737	0.0952135	-0.541951	0.00735758	-0.167492	-0.0504021	-0.201605	0.0270584	0.128506	0.0556112
PSS008	-1.44239	-1.3746	-0.0165421	-1.96319	-1.08217	-0.508358	-0.26834	-0.307259	-1.70521	-1.51507	-2.34464	-0.109753	-0.0945003	0.269933	0.0493329	-0.0138509	-1.11786	-0.0976793	-0.22407	-0.000558954	0.0903034	0.0797172	0.0747503	-0.152931	-0.138305	-0.145089	-0.0576121
PSS131R	-1.71286	-2.2312	0.0964767	-2.17529	-0.94496	-0.987561	-0.064154	-0.876846	-1.90987	-1.20784	-2.33922	-0.122471	-0.225959	0.0618564	0.0489354	0.0615141	-1.52773	0.0981706	-0.218878	-0.212782	0.114824	0.110331	-0.00232604	0.0600631	-0.0848713	-0.14255	-0.552166
SAOS2	-1.15616	-1.96713	0.0307538	-1.87958	-1.22684	-0.251695	0.165441	-0.0202711	-2.06449	-1.06837	-1.90853	-0.272181	-0.0733271	0.0932593	0.188163	0.195423	-1.35783	-0.184248	-0.108775	-0.0521883	-0.0880946	0.0643196	0.105561	-0.0576447	-0.00164871	0.0357816	-0.0918063
SJSA1	-1.5602	-1.88438	-0.0146426	-1.91574	-0.474995	-0.808557	0.0818371	0.0266982	-1.96445	-1.71635	-2.3247	-0.119538	-0.0899731	0.0396803	0.00169116	0.0779723	-1.39019	-0.0338805	-0.245342	-0.162166	-0.116943	0.0148532	-0.0156576	-0.0639238	-0.0522486	-0.0387678	-0.415645
U2OS	-1.46995	-1.97952	-0.0790609	-1.85645	-0.507388	-0.406386	-0.0441057	-0.466786	-1.99196	-1.32774	-2.1086	-0.0590661	-0.0923125	-0.14722	-0.0559496	-0.128854	-1.18444	-0.178282	-0.2088	-0.510938	-0.179875	-0.164272	0.0332261	0.0970343	-0.142424	-0.0412196	-0.262959
Dependent	1	0	4	0	6	11	8	9	0	0	0	11	8	5	3	6	1	8	11	10	6	3	6	9	10	8	9
highly dependent	11	12	0	12	6	1	0	1	12	12	12	0	0	0	0	0	11	0	0	1	0	0	0	0	0	0	0
non-dependent	0	0	8	0	0	0	4	2	0	0	0	1	4	7	9	6	0	4	1	1	6	9	6	3	2	4	3
% Dependent cell lines	8.33333	0	33.3333	0	50	91.6667	66.6667	75	0	0	0	91.6667	66.6667	41.6667	25	50	8.33333	66.6667	91.6667	83.3333	50	25	50	75	83.3333	66.6667	75
% Highly dependent cell lines (<-1)	91.6667	100	0	100	50	8.33333	0	8.33333	100	100	100	0	0	0	0	0	91.6667	0	0	8.33333	0	0	0	0	0	0	0
non-dependent cell lines	0	0	66.6667	0	0	0	33.3333	16.6667	0	0	0	8.33333	33.3333	58.3333	75	50	0	33.3333	8.33333	8.33333	50	75	50	25	16.6667	33.3333	25

## Sheet: GB
Supplementary table BB: Dependency of tumor cell lines on the indicated kinases retrieved from de DepMap. Scores with negative values mark those cell lines where the given gene is especially important for growth or survival.
	Dependency scores
Cell line	AURKA	AURKB	AURKC	CDK1	CDK2	CDK4	CDK5	CDK6	CDK7	CDK9	PLK1	AKT1	AKT2	AKT3	GSK3A	GSK3B	MTOR	ALK	EGFR	FGFR1	FGFR2	FGFR3	FGFR4	KDR	MET	RET	MAPK1
170MGBA	-1.56626	-2.14941	0.0936888	-2.28381	-0.765258	-0.529663	-0.00894229	-0.516749	-1.97801	-1.59012	-2.32793	-0.0736806	0.0379594	0.16588	-0.0772247	-0.353617	-1.05911	-0.0861228	-0.107234	-0.181391	-0.0161905	0.101733	-0.145568	-0.156414	-0.693363	-0.208145	-0.24123
42MGBA	-1.25069	-2.19999	-0.000423936	-2.09391	-0.188002	-0.206611	-0.0387863	-0.516704	-2.10964	-1.69973	-2.62881	0.192214	-0.0994527	-0.0288919	-0.189537	-0.544762	-0.696295	0.0598186	-0.0610262	-0.225334	0.0253524	-0.139094	0.0368121	0.011958	-0.547596	0.0634061	0.033709
8MGBA	-1.18842	-1.88716	-0.00742266	-2.00028	-0.370163	-0.298301	-0.0632885	-1.10472	-1.86975	-1.57671	-2.20296	-0.0836459	-0.10902	0.167717	0.0264699	-0.193867	-1.04905	-0.0672991	-0.0354361	-0.121228	-0.0574195	0.176931	-0.11846	0.0478794	-0.763684	0.00408295	-0.0949382
A172	-1.82401	-1.76648	0.0833831	-2.26473	-0.381376	-0.241578	-0.026646	-0.222961	-1.68833	-1.94428	-2.20728	-0.0773426	-0.0977523	0.00778904	-0.0994148	-0.114036	-0.996419	-0.00457784	-0.119873	-0.265626	-0.0639993	-0.099617	-0.00128705	-0.0589922	-0.0432218	-0.104497	-0.177133
AM38	-1.34343	-1.89523	0.0358434	-1.90256	-0.829631	-0.271391	-0.130906	0.00270298	-1.84143	-1.40791	-2.22398	-0.0788243	-0.103934	-0.00283917	0.0515462	0.0671235	-1.10905	-0.0559318	0.015208	-0.177044	0.031311	-0.0766816	-0.08207	-0.156523	-0.0829969	-0.00773385	-0.0947656
ANGMCSS	-1.59181	-1.68856	-0.0222597	-1.22142	-1.39435	-0.605461	0.110314	-0.0892111	-1.62509	-1.45922	-2.47416	-0.277727	0.044042	-0.100076	0.280735	0.217772	-1.13836	-0.101231	-0.0841094	-0.261893	-0.0507438	0.012897	-0.0403674	-0.1585	-0.0382265	0.319589	-0.246347
BECKER	-1.80716	-1.46201	-0.00604283	-1.77264	-0.554587	-1.00774	-0.09688	-0.764422	-1.51011	-1.37149	-2.3666	-0.0234783	-0.0806926	0.0562485	-0.0735927	0.0557335	-1.15071	0.0640078	-0.139882	-0.629221	0.0325109	0.101167	0.0260342	-0.137113	-0.0686354	-0.0237933	-0.00221071
CAS1	-1.27717	-2.05694	-0.10304	-2.13859	-0.825556	-0.197754	-0.141882	-0.806867	-1.83547	-1.51979	-2.3456	-0.263421	-0.0883411	0.0730217	0.0541725	-0.0842159	-1.13807	0.0162276	-0.00511237	-0.353423	-0.028986	5.23e-06	-0.106541	-0.230266	-0.120346	-0.175469	-0.340159
CCFSTTG1	-1.27663	-1.91244	0.053104	-1.82367	-0.926387	-0.312049	-0.134389	-0.10106	-2.02079	-1.38279	-2.21365	-0.0471688	-0.0782844	0.0729939	-0.0716193	-0.128459	-1.01775	-0.0602232	-0.0602137	-0.176858	-0.0646213	0.073554	0.0483148	-0.140777	-0.0424522	-0.0168034	-0.0940999
D423MG	-1.37773	-2.18427	0.00748663	-2.30603	-0.71265	-0.394982	-0.076785	-0.602849	-1.94378	-1.67831	-2.34074	-0.0667421	-0.12774	0.307615	0.146078	-0.0141551	-1.594	0.0513235	-0.181361	-0.32378	-0.0059413	0.0918394	-0.0987837	-0.191037	0.0121307	0.0370379	-0.281276
D502MG	-1.39868	-1.63408	-0.0221545	-1.99323	-1.25466	-0.182486	-0.0665989	-0.955929	-1.85328	-1.4703	-1.98231	-0.114536	-0.00663043	0.0831366	-0.0200046	-0.0501492	-1.6276	-0.0522534	-0.117932	-0.0625195	-0.0488784	-0.0860242	-0.0317676	0.00391455	-1.09549	-0.0793595	0.0892098
D542MG	-0.989043	-2.11398	0.0835279	-1.7399	-1.39524	-0.375405	-0.0682005	-0.12249	-2.08055	-1.79467	-2.14949	-0.642938	-0.155153	0.162195	0.376327	0.14827	-1.12181	-0.220402	-0.00692254	-0.583872	-0.116952	-0.0472091	-0.0519059	-0.475293	-0.0535634	-0.0132302	-0.182854
DBTRG05MG	-1.51664	-2.03696	0.0893658	-2.29935	-1.12566	-0.166958	0.0239505	0.118611	-1.83987	-1.44215	-2.45205	-0.329534	-0.0681047	0.0627432	0.106462	-0.296557	-1.24618	-0.180624	-0.238503	0.00275783	0.0144002	-0.0238089	0.0746001	-0.124622	-0.042438	-0.09288	-0.129937
DKMG	-1.35497	-1.95308	0.0524577	-2.0124	-0.591128	-0.512586	-0.11252	-0.130356	-1.85187	-1.40363	-2.09178	-0.0582474	0.052233	-0.0216809	0.0786578	0.043968	-1.35977	-0.0520942	-0.083747	-0.914823	-0.0781089	-0.00336217	-0.0509644	-0.160727	0.023803	-0.0415726	0.00726285
GAMG	-1.36007	-2.05239	-0.0345463	-1.99624	-0.681668	-0.548673	0.0261113	-0.217018	-1.81432	-1.61535	-2.38693	-0.170002	-0.0217441	0.0560533	-0.0488378	0.00902965	-1.55856	0.0176908	-0.130477	-0.584508	-0.0127971	0.0214107	0.0424807	-0.142506	-0.134555	-0.0873872	-0.0863195
GB1	-1.31049	-1.88912	0.0873532	-1.84745	-0.426568	-0.214186	0.00559411	-0.368867	-2.07753	-1.43661	-2.23219	-0.0648842	-0.148303	0.0898408	-0.0627873	-0.107934	-1.2007	-0.0399662	0.00909467	-0.0262601	0.120884	0.116799	0.0616887	-0.110601	0.0726321	-0.0573194	-0.419185
GI1	-1.2854	-2.07217	0.0415437	-2.21955	-0.820949	-0.405491	-0.0669838	-0.588521	-2.04677	-1.48197	-2.33947	-0.205499	-0.00185846	0.0559627	0.015111	-0.0582789	-1.29128	0.105271	-0.121056	-0.275341	0.00283814	0.0296901	-8.56e-05	-0.0917087	-0.291003	-0.0749962	0.011118
H4	-1.51412	-1.90864	0.0564813	-2.02459	-1.16266	-1.23798	0.274185	-0.638418	-1.94632	-1.36688	-2.30135	-0.175861	-0.0407811	0.224975	0.185896	0.136529	-1.44069	-0.0114924	-0.0628447	-0.596724	0.122317	-0.0549794	-0.0269268	0.046474	-0.328485	-0.0796108	0.232666
HS683	-1.41988	-2.0858	-0.0693167	-2.22023	-0.699526	-0.284736	0.00127654	-0.643951	-1.91682	-1.3071	-2.30126	-0.132293	-0.163388	0.0556496	0.0624284	-0.0130888	-1.30661	0.0646863	-0.199647	-0.222383	-0.112545	0.146198	-0.0864897	-0.019871	-0.002819	-0.106412	-0.18793
KALS1	-1.24262	-2.05786	-0.0559976	-2.18889	-0.57251	-0.283186	0.0273923	-0.389726	-2.16488	-1.37321	-2.29267	-0.0360346	-0.0765302	0.148322	-0.146051	-0.000649864	-1.35388	-0.142458	-0.0809256	-0.138062	-0.0311712	0.034755	-0.0485775	-0.0903414	-0.0621867	-0.0777659	-0.226123
KINGS1	-1.57604	-2.02547	0.0765699	-2.13916	-1.06426	-1.09234	0.0238534	-0.250147	-1.69608	-1.67748	-2.26682	-0.178028	-0.0601008	0.0896975	-0.0364956	0.0473439	-1.24959	-0.140259	-0.151536	-0.0875423	0.0934445	-0.0234708	0.044027	-0.12731	-0.509963	-0.0851079	0.0615569
KNS42	-1.39372	-2.19587	0.0389844	-2.05887	-1.01241	-0.380414	-0.193987	-1.35313	-2.04678	-1.38356	-2.13634	-0.150854	-0.183163	0.14409	0.142896	-0.164137	-1.1667	0.07087	-0.0141644	-0.140424	-0.0222923	0.0476814	-0.0507521	-0.137319	-0.267925	0.0626167	-0.257239
KNS60	-1.40621	-1.78339	-0.0348342	-2.03863	-0.550605	-0.474168	0.0446324	-0.728916	-1.69467	-1.63602	-2.1095	-0.0209744	-0.0180531	0.0241211	-0.327377	-0.170337	-0.967941	-0.0394087	-0.162636	-1.04191	0.146735	0.100395	-0.0447875	-0.0571198	0.0846919	-0.147148	-0.0545439
LN18	-1.25748	-1.54634	0.134477	-2.01093	-1.33035	-1.03317	-0.0448354	-0.912679	-1.79199	-1.50338	-2.06854	-0.00175696	0.109254	0.0969325	-0.0414163	-0.253551	-1.12406	-0.0361647	-0.0749647	0.0592707	-0.0326912	0.035746	0.0597464	-0.211434	-0.201513	-0.164217	-0.179109
LN229	-1.41804	-2.33781	-0.015767	-2.03435	-1.16341	-0.957309	-0.151603	-0.726226	-1.86222	-1.65898	-2.28623	-0.120152	-0.0958964	0.0979876	-0.0105633	0.0353726	-1.22394	-0.0142061	-0.257491	-0.286973	-0.000475276	0.0129749	-0.0658182	-0.133208	-0.072434	0.0410446	-0.266263
LN235	-1.33151	-1.93755	-0.0432905	-2.16267	-0.751311	-0.434515	-0.096576	-0.811281	-1.54889	-1.29193	-2.3824	-0.119366	0.105212	0.0955163	0.108244	-0.00595795	-1.33992	0.0323797	-0.0699401	-0.422915	-0.0234423	-0.0390585	0.00510457	-0.217711	-0.161477	-0.0144954	-0.0770053
LN319	-0.9431	-1.78476	-0.0611794	-2.05912	-0.536823	-0.327753	-0.0154531	-0.134515	-1.97169	-1.45055	-2.09391	0.0643216	0.116457	0.149402	0.00811327	0.0736835	-1.38238	0.0986881	-0.22213	-0.086102	0.0528259	0.117681	-0.00753158	0.0463955	-0.194352	0.0523209	0.0290309
LN340	-1.44313	-1.89959	0.0267778	-2.12761	-0.815403	-0.327665	-0.16718	-0.766416	-1.88617	-1.39785	-2.07888	-0.237239	0.150398	0.0598952	0.070427	0.0481251	-1.01292	-0.0222468	-0.504744	-0.190862	-0.143863	-0.0102371	-0.0410448	0.0759421	-0.0634582	0.0853626	0.0684453
LN382	-1.57935	-1.81049	0.0210795	-1.86058	-1.18027	-0.39305	0.0270347	-0.0390428	-1.43212	-1.36113	-2.38297	-0.232132	0.151294	0.00984064	0.170005	0.19329	-1.51638	-0.105444	-0.14092	-0.171113	0.00155719	0.0358208	-0.167777	-0.174395	-0.0658441	-0.0957583	-0.128649
LN382	-1.28023	-1.93362	-0.164341	-2.17908	-0.686245	-0.703451	-0.2382	-0.803785	-1.8793	-1.61613	-2.28385	-0.109902	0.0945229	0.0610365	0.0702723	0.134365	-1.34302	-0.0583169	-0.150108	-0.0792496	0.0541383	-0.104976	-0.0777554	-0.0213793	-0.231955	0.0168632	-0.515609
LN443	-1.56908	-1.86267	0.0305435	-1.5015	-0.835482	-0.595094	-0.142289	-0.71625	-1.68711	-1.27913	-2.32572	-0.10111	-0.0281754	0.122221	0.253029	0.264567	-0.954777	-0.11038	0.192793	-0.312517	0.00320408	0.123691	-0.11042	-0.177344	-0.817927	0.0555861	-0.542313
LNZ308	-1.45756	-1.82788	0.0321407	-2.12385	-0.443921	-0.287559	0.0168425	-0.324651	-1.86021	-1.60967	-2.2841	-0.133402	0.0410532	0.0386101	0.0804545	0.0602301	-1.3848	-0.0166375	-0.0593103	-0.198439	-0.0334832	-0.0181474	-0.0358332	-0.185155	-0.0677407	-0.113987	-0.160101
LNZTA3WT4	-0.893722	-2.08408	-0.0571776	-1.87432	-0.557263	-0.252593	0.0320704	0.0621945	-1.91809	-1.69439	-2.27511	-0.0823535	-0.207682	0.120897	-0.285561	-0.0657156	-1.18819	0.107573	-0.00714364	-0.0490219	0.0817599	-0.0594338	-0.0975886	-0.124656	-0.371953	-0.0140407	-0.084835
M059K	-1.42934	-2.24576	0.085516	-2.07009	-1.39264	-0.14616	-0.129859	0.02207	-1.93776	-1.41233	-2.0898	-0.216665	0.0565185	0.00369866	0.149016	-0.0316586	-1.44978	0.00231788	-0.0943318	-0.311136	-0.105688	-0.106693	-0.0731522	-0.0892524	-0.187509	0.0253469	-0.439834
MOGGUVW	-1.47506	-1.83556	0.0700504	-2.02574	-0.655508	-0.958265	-0.147568	-0.941374	-1.87577	-1.10817	-2.39624	0.038459	0.191972	0.109995	0.213687	0.100188	-1.24591	-0.145245	-0.105801	-0.0328051	0.074472	-0.144253	0.0294449	-0.153503	-0.151495	-0.141648	-0.248303
NMCG1	-0.971524	-2.15717	-0.0420315	-2.23729	-0.251195	-0.207348	-0.148132	-0.432364	-1.88487	-1.53639	-2.3808	-0.0675515	0.0952457	-0.0364169	0.08723	-0.0442156	-1.57791	-0.0424066	0.180863	-1.06427	-0.0875307	-0.20674	0.0489896	-0.306	-0.126127	-0.101657	-0.184527
NO10	-1.08037	-1.91544	0.0838586	-1.98585	-0.91206	-0.868893	0.0811033	-0.466052	-1.90794	-1.57316	-2.46375	-0.133418	-0.190877	0.135504	0.090069	0.0894831	-1.03917	0.0590374	0.00212136	-0.108171	-0.00357987	0.0703123	0.0153785	-0.141731	-0.339459	-0.100141	-0.0257656
NO11	-1.13677	-1.96838	0.0549834	-1.86055	-0.650332	-0.574332	-0.00168546	-0.340233	-1.89518	-1.29214	-2.18053	-0.0183908	-0.00587954	0.0221449	0.0269624	-0.0662662	-1.13073	-0.0437185	-0.35012	-0.0735526	-0.0242214	-0.0121663	-0.0257636	-0.0483017	-0.0739455	0.0390959	-0.218426
NP2	-1.16341	-2.31056	0.154409	-1.7446	-0.79464	-0.450349	-0.099003	-0.562668	-1.83392	-1.2919	-2.2478	-0.160162	-0.209241	0.218718	-0.0195944	-0.0360273	-0.87851	-0.109943	0.0714377	-0.538627	0.170385	0.090984	0.0131129	-0.128854	-0.432162	-0.266731	-0.186085
NP3	-1.01753	-2.19306	0.111102	-1.92021	-0.208531	-0.463756	0.0154445	-0.35724	-2.0298	-1.96666	-1.88137	-0.247134	-0.0565866	0.018829	0.103811	0.0311044	-1.61521	-0.0178308	-0.0747474	-0.153926	0.0210287	-0.0277022	0.0463787	-0.207538	-0.211283	-0.00771136	-0.134805
NP5	-1.34628	-2.22085	0.104879	-2.05217	-0.409319	-0.213255	-0.0454212	-0.334896	-2.01211	-1.71521	-2.09432	-0.0986775	-0.0423493	0.170249	0.0484488	-0.00714654	-1.33647	0.0987963	-0.143229	-0.139073	0.0265372	0.0419467	0.0249721	-0.0793341	-0.0887752	-0.0754273	-0.209507
NP8	-1.08254	-2.23867	0.0166102	-2.07556	-1.12365	-1.29106	-0.0451548	-0.405681	-1.91988	-1.60579	-2.25813	-0.394345	-0.0149836	0.0507543	0.117644	0.124741	-1.65913	-0.00493594	-0.0790258	-0.918405	-0.00373971	-0.00435933	-0.0120957	-0.398945	-0.179598	-0.00076287	-0.0580999
ONDA7	-1.56213	-1.9342	0.0263197	-2.01462	-1.05184	-1.61321	-0.0183269	-0.063803	-1.86627	-1.25238	-2.26203	-0.00861825	-0.0798098	-0.0762096	0.0458898	-0.0131959	-1.51589	0.046135	-0.119668	-0.126933	0.0106122	0.180786	0.00970228	-0.17625	-0.0579081	0.0867559	-0.912032
ONDA8	-1.43277	-1.96143	0.13705	-1.98187	-0.267404	-0.684537	-0.0973949	0.0496391	-1.72592	-1.54129	-2.27958	-0.0972743	-0.178521	0.0302604	0.0380884	0.101315	-1.74273	-0.150076	-0.0508015	-0.450995	0.0362137	0.130313	-0.0115214	-0.155475	-0.00754449	-0.05516	-0.247889
ONDA9	-1.69071	-2.03995	-0.0359137	-2.02161	-0.320858	-0.28347	-0.132303	-0.0812213	-1.78699	-1.6638	-2.28042	-0.0491063	-0.0966542	0.031606	0.230282	0.125829	-1.43305	0.045138	-0.0920106	-0.630418	-0.123655	-0.0608324	-0.0505298	-0.125388	-0.125616	-0.0594737	-0.0690053
SF126	-1.52507	-1.89532	-0.0223911	-2.05474	-0.822433	-0.56425	-0.185562	-0.922667	-1.85954	-1.59646	-2.26268	-0.108802	-0.0638446	0.0265325	-0.15153	0.0206836	-0.986249	0.00968813	0.104638	-0.0600587	-0.0344291	-0.0226842	-0.119268	-0.164469	-0.0697174	-0.190163	-0.546163
SF172	-1.40847	-1.83723	0.0980225	-1.78148	-1.31591	-0.252789	-0.0307733	-0.135299	-2.08711	-1.45791	-2.2017	-0.169647	0.033186	-0.0406098	0.0356013	-0.0484134	-1.35788	-0.0040168	-0.194125	-0.0329138	0.0592476	-0.0575182	-0.0177094	-0.0580779	-0.106862	0.00468747	-0.113807
SF268	-1.55483	-1.99868	0.0741281	-2.22076	-1.6313	-0.417719	-0.0146802	-0.0802843	-1.91086	-1.40066	-2.36438	-0.111037	-0.310121	0.0848246	0.0443405	0.126872	-1.35254	-0.00297926	-0.003189	-0.170261	0.0100313	-0.176767	-0.000287538	-0.081667	-0.201504	-0.12201	0.0334033
SF295	-1.11466	-1.88181	0.0238663	-2.25763	-0.622301	-0.191978	0.0129464	-0.875477	-2.01639	-1.28998	-2.14579	-0.000977211	-0.0173792	0.0595071	-0.0384693	-0.0477823	-1.07342	-0.0423002	-0.113415	-0.835191	-0.041322	0.0342041	-0.0061375	-0.0542781	-0.0895661	0.0117852	-0.308857
SF539	-1.67021	-1.93929	-0.046876	-2.27723	-0.42075	-0.191577	0.0437746	-0.142528	-1.93809	-1.25681	-2.34068	-0.233918	0.200212	0.0137738	0.0782976	0.0550754	-1.22369	0.0272512	-0.087754	-0.96915	-0.0907234	-0.0427797	-0.122437	-0.204335	-0.0348684	-0.0801425	-0.168779
SKMG1	-1.61676	-1.75801	0.161634	-1.96422	-0.975965	-0.883498	0.0139184	-0.623479	-1.91944	-1.22129	-2.53603	-0.261435	0.0166514	0.202507	0.22471	-0.0235046	-0.918528	-0.274038	-0.0473126	-0.0100967	-0.0701083	0.167748	0.10889	-0.0504663	0.084045	-0.193924	-0.398049
SNB75	-1.31511	-1.92106	0.0629945	-2.10017	-0.856001	-0.674752	-0.149162	-0.324605	-1.81256	-1.38993	-2.4925	-0.174186	0.0640236	0.232801	-0.108454	-0.420489	-1.21226	-0.0354365	-0.0287385	-0.709582	0.00437426	0.0663869	-0.0191577	0.21872	-0.126767	-0.136755	0.0770219
SNU1105	-1.62702	-1.76983	0.137707	-2.05332	-0.625329	-0.6045	0.0105271	-0.0677129	-1.8391	-1.48519	-2.30291	-0.0833307	0.0892229	-0.0387394	-0.00451434	-0.172151	-0.69775	-0.112498	-0.058574	-0.502503	-0.0785349	0.0167444	-0.0909002	-0.119234	-0.0449309	-0.107971	-0.0114973
SNU201	-1.80734	-1.87102	0.00364038	-2.20655	-1.07984	-1.25413	-0.145346	-0.429903	-1.86479	-1.33957	-2.0969	-0.0151844	0.0133377	0.247089	-0.157744	-0.147849	-1.54133	-0.0919714	-0.0303177	-1.28444	-0.0537998	0.289705	-0.025095	-0.209502	-0.139113	-0.354601	-0.0307631
SNU626	-1.72988	-2.00189	-0.00896477	-2.01147	-0.876965	-0.550293	-0.0921572	-0.93015	-1.91028	-1.30329	-2.37405	-0.167177	0.216208	0.309483	0.063746	-0.0787464	-0.876753	-0.0539043	-0.183716	-0.0813686	0.0715424	0.0101188	-0.181367	0.0995999	-0.103757	0.00664484	0.0988029
SNU738	-1.17704	-2.0433	0.0985348	-1.90523	-0.614146	-0.318412	-0.0322602	-0.228193	-1.85014	-1.55378	-2.05043	-0.0660798	-0.0523467	-0.0548951	0.0697277	-0.0467045	-1.52243	0.0569937	-0.63275	-0.157441	-0.058359	0.0125913	-0.0593978	-0.207725	-0.0775856	0.0496505	-0.333648
SW1088	-1.37474	-2.02504	0.0609426	-1.92838	-0.751544	-0.41894	-0.00396075	-0.58165	-1.87922	-1.66556	-2.17614	-0.329445	0.0193814	0.0557195	0.174472	-0.00562486	-1.55482	-0.0279171	-0.115679	-0.0952757	-0.0951842	0.0409785	0.0127985	-0.0210696	-0.53374	-0.150597	-0.11507
T98G	-1.38365	-1.78065	0.128632	-1.89072	-0.69259	-0.4329	-0.00438697	-1.02128	-2.01375	-1.58273	-2.37487	-0.159261	0.118086	0.0493988	0.128855	-0.000761929	-1.14944	-0.26914	0.041534	-0.865793	-0.191657	-0.243175	-0.047285	-0.176959	-0.311655	-0.125144	-0.162041
TM31	-1.53963	-1.89147	-0.0122529	-2.22356	-0.829531	-0.211075	0.083937	-0.737697	-1.76969	-1.38645	-2.21469	-0.167662	-0.0977485	0.100723	0.0564299	-0.0027265	-1.3023	-0.100452	-0.056288	-0.21893	-0.0967251	-0.0485058	0.0370459	-0.0805059	-0.127494	-0.149344	-0.199234
U118MG	-1.40703	-1.61587	-0.0841987	-1.76162	-1.01758	-0.28523	-0.224605	-0.225701	-1.34245	-1.33103	-2.48469	0.0794459	0.112841	-0.440315	-0.26644	0.0211068	-1.10561	0.0525536	-0.145084	0.217276	0.200379	0.0618285	0.105517	-0.0638518	0.047358	0.14394	-0.128385
U251MG	-1.21023	-2.11022	-0.0279075	-1.84282	-0.993011	-0.46788	-0.0861342	-0.447363	-1.60519	-1.57775	-2.18314	-0.120526	-0.00735504	0.111739	-0.0599778	-0.307932	-1.29608	-0.0623289	-0.0747963	-0.553658	0.000752606	0.000813542	-0.0408984	-0.114372	-0.0737819	-0.0358879	-0.0760063
U251MGDM	-1.26815	-1.91234	0.138447	-2.28633	-0.24646	-0.180319	-0.172969	-1.01451	-2.01417	-1.32143	-1.7315	-0.212155	-0.255808	-0.0660957	0.244704	0.253289	-1.41417	-0.145964	-0.268256	-0.463034	-0.00920911	-0.0118655	-0.034879	-0.134464	-0.806252	-0.0460829	-0.343127
U343	-1.68339	-2.05627	0.039155	-2.07835	-1.26169	-0.33755	-0.0656474	-0.910442	-2.09092	-1.43529	-2.48041	-0.28515	-0.0844417	0.0529703	0.084781	0.111848	-1.33261	0.0619809	-0.0821164	-0.702961	-0.0594613	0.116383	-0.0907613	0.00109987	-0.741246	-0.0257623	0.137148
U87MG	-1.41622	-2.28835	0.0234868	-1.77951	-0.625299	-0.533744	0.000994477	-0.623002	-2.12127	-1.74217	-2.18047	-0.256064	-0.0301496	0.137307	0.250136	0.162157	-1.28183	-0.08684	-0.0528608	-0.564835	-0.0220108	-0.00168364	0.0254365	-0.174124	-0.808407	-0.187426	-0.26036
YH13	-1.66098	-2.11342	0.0260618	-2.09689	-1.01852	-0.866462	-0.100395	-0.605525	-1.91268	-1.57281	-2.49154	-0.0682234	-0.0118917	0.188467	0.0311891	0.0507814	-1.45185	-0.10998	-0.131292	-0.545017	-0.0359366	0.100532	-0.0930082	-0.135293	-0.5312	-0.151398	-0.0889169
YKG1	-1.12105	-1.8457	0.0118765	-2.20827	-0.575799	-0.247016	0.030847	-0.128141	-1.88515	-1.94541	-2.32667	0.0336305	0.0451141	-0.0371291	0.100662	-0.0544135	-1.31222	0.0585211	-0.200094	-0.162564	-0.178	0.152349	0.0303008	0.0629872	-0.0166545	-0.0626668	-0.0371629
Dependent	4	0	23	0	47	60	45	57	0	0	0	61	43	12	22	37	9	44	58	61	40	29	44	56	60	56	54
highly dependent	62	66	0	66	19	6	0	4	66	66	66	0	0	0	0	0	57	0	0	2	0	0	0	0	0	0	0
non-dependent	0	0	43	0	0	0	21	5	0	0	0	5	23	56	44	29	0	22	8	3	26	37	22	10	6	20	12
% Dependent cell lines	6.06061	0	34.8485	0	71.2121	90.9091	68.1818	86.3636	0	0	0	92.4242	65.1515	18.1818	33.3333	56.0606	13.6364	66.6667	87.8788	92.4242	60.6061	43.9394	66.6667	84.8485	90.9091	84.8485	81.8182
% Highly dependent cell lines (<-1)	93.9394	100	0	100	28.7879	9.09091	0	6.06061	100	100	100	0	0	0	0	0	86.3636	0	0	3.0303	0	0	0	0	0	0	0
non-dependent cell lines	0	0	65.1515	0	0	0	31.8182	7.57576	0	0	0	7.57576	34.8485	84.8485	66.6667	43.9394	0	33.3333	12.1212	4.54545	39.3939	56.0606	33.3333	15.1515	9.09091	30.303	18.1818

## Sheet: MB
Supplementary table BB: Dependency of tumor cell lines on the indicated kinases retrieved from de DepMap. Scores with negative values mark those cell lines where the given gene is especially important for growth or survival.
	Dependency scores
Cell line	AURKA	AURKB	AURKC	CDK1	CDK2	CDK4	CDK5	CDK6	CDK7	CDK9	PLK1	AKT1	AKT2	AKT3	GSK3A	GSK3B	MTOR	ALK	EGFR	FGFR1	FGFR2	FGFR3	FGFR4	KDR	MET	RET	MAPK1
D283MED	-1.19754	-2.00132	-0.103947	-1.4221	-0.989021	-0.14094	-0.11008	-0.81282	-2.25455	-1.39756	-1.89808	-0.0137253	-0.12232	-0.0981773	0.00763293	0.232845	-0.903843	0.0725204	0.00456671	-0.0677124	0.00242292	-0.037142	0.105093	-0.158117	-0.114461	-0.175936	-0.336702
D341	-1.05208	-2.08585	0.100032	-2.05597	-0.618336	-0.308977	-0.000502229	-0.898234	-2.08139	-1.96108	-2.44954	-0.0826638	-0.00356139	-0.133174	0.102343	0.00317618	-1.36335	0.00684713	-0.0962218	-0.058875	-0.0910788	0.116246	0.0688087	0.0170467	-0.0578391	0.127569	0.0316818
D425	-1.29234	-1.66946	-0.106881	-2.32175	-0.710673	-0.246426	0.217805	-1.50869	-1.58811	-1.41938	-1.50717	-0.188214	-0.151142	-0.123729	-0.0291887	0.000339355	-1.66638	-0.150291	0.0349595	0.0922191	0.0627376	-0.0757	-0.14389	-0.0662642	-0.0542009	-0.0021505	-0.0384906
D458	-1.03603	-2.04845	0.17231	-2.07707	-0.873028	-0.170305	0.132671	-0.851168	-1.50347	-1.04284	-2.422	-0.0168366	0.111094	0.0714955	-0.0443902	0.081655	-1.25835	-0.0505907	0.0713268	0.0164361	-0.0201418	0.0913633	-0.0062298	-0.151617	-0.0022682	-0.0549307	-0.0257233
DAOY	-1.62535	-1.85737	-0.0383189	-1.70879	-0.653754	-0.288929	-0.0509909	-0.512885	-1.95529	-1.49936	-2.37979	-0.0841309	-0.125893	0.180936	-0.0146465	-0.000209172	-1.23262	0.0586591	-0.0654753	-0.529876	-0.00101453	0.0097467	-0.0289873	-0.132892	-0.027623	-0.10541	-0.0863225
ONS76	-1.3542	-1.5245	-0.0570564	-1.92242	-0.654907	-0.339725	-0.24669	-0.888078	-1.83737	-1.33867	-2.15625	-0.128547	-0.151968	-0.0827233	0.204983	0.19562	-0.923178	0.177264	-0.0604339	-0.126945	-0.0526028	0.0693471	0.0922497	-0.104941	-0.157853	0.0294986	-0.666597
UW228	-1.04575	-2.03855	-0.0272746	-2.01283	-1.01817	-0.157469	0.0483869	0.105556	-1.90762	-1.49415	-2.27809	-0.22577	0.0202153	-0.00926169	0.208396	0.384207	-1.45885	0.0108304	-0.100028	-0.335544	-0.197004	-0.0202849	-0.0398887	-0.100372	0.0763142	-0.0959411	-0.269938
Dependent	0	0	5	0	6	7	4	5	0	0	0	7	5	5	3	1	2	2	4	5	5	4	4	6	6	5	6
highly dependent	7	7	0	7	1	0	0	1	7	7	7	0	0	0	0	0	5	0	0	0	0	0	0	0	0	0	0
non-dependent	0	0	2	0	0	0	3	1	0	0	0	0	2	2	4	6	0	5	3	2	2	3	3	1	1	2	1
% Dependent cell lines	0	0	71.4286	0	85.7143	100	57.1429	71.4286	0	0	0	100	71.4286	71.4286	42.8571	14.2857	28.5714	28.5714	57.1429	71.4286	71.4286	57.1429	57.1429	85.7143	85.7143	71.4286	85.7143
% Highly dependent cell lines (<-1)	100	100	0	100	14.2857	0	0	14.2857	100	100	100	0	0	0	0	0	71.4286	0	0	0	0	0	0	0	0	0	0
non-dependent cell lines	0	0	28.5714	0	0	0	42.8571	14.2857	0	0	0	0	28.5714	28.5714	57.1429	85.7143	0	71.4286	42.8571	28.5714	28.5714	42.8571	42.8571	14.2857	14.2857	28.5714	14.2857

## Sheet: NB
Supplementary table BB: Dependency of tumor cell lines on the indicated kinases retrieved from de DepMap. Scores with negative values mark those cell lines where the given gene is especially important for growth or survival.
	Dependency scores
Cell line	AURKA	AURKB	AURKC	CDK1	CDK2	CDK4	CDK5	CDK6	CDK7	CDK9	PLK1	AKT1	AKT2	AKT3	GSK3A	GSK3B	MTOR	ALK	EGFR	FGFR1	FGFR2	FGFR3	FGFR4	KDR	MET	RET	MAPK1
BE2M17	-1.47927	-1.90089	0.0090225	-2.1165	-0.434474	-0.336699	-0.0120304	-0.831565	-1.84692	-1.44844	-2.34214	-0.0767255	-0.0491266	-0.00793676	-0.12014	-0.0175763	-1.07259	-0.0980963	-0.306885	-0.224728	-0.0669918	0.021332	-0.000550847	-0.171858	-0.0669748	-0.0846212	-0.118434
CHLA15	-1.48542	-1.45307	-0.0960062	-1.71991	-0.508864	-0.758425	-0.19142	-0.786658	-1.89167	-1.45848	-2.47233	0.0298232	-0.14348	0.0220583	-0.0898422	-0.147106	-1.27064	-1.08584	-0.132535	0.0552375	0.0235201	-0.129145	-0.027602	0.0551524	-0.0878073	-0.0891624	-0.0851833
CHP134	-1.70969	-2.08341	-0.214061	-1.99776	-0.51566	-0.281743	-0.297478	-0.465136	-1.72736	-1.72649	-2.46483	-0.14609	0.0132935	0.157749	0.0302605	-0.144981	-1.03176	-0.119406	-0.21359	-0.300659	0.0136621	0.0866686	0.0790019	-0.106375	-0.177073	-0.0291902	0.0836909
CHP212	-1.02723	-2.03297	-0.0790417	-2.27192	-0.386125	-0.556755	-0.0231098	-0.189862	-1.12467	-1.41357	-2.22154	-0.122038	0.0362598	-3.25e-05	0.0847717	-0.0127158	-0.822977	-0.0448302	-0.100485	-0.101265	-0.00174227	0.0480542	-0.0508479	-0.0170094	-0.0112578	0.0324279	-0.431675
COGN278	-1.67851	-1.61962	0.112577	-2.07253	-0.220441	-0.463014	0.038193	-0.24566	-1.66931	-1.2754	-2.33815	0.148803	-0.0450731	0.0490439	-0.19023	-0.274206	-0.678811	-0.01852	0.0162738	-0.0550336	-0.0931138	0.112768	0.0592024	-0.0653578	-0.0667018	-0.0303198	-0.190477
COGN305	-1.30158	-1.93529	0.234961	-1.99401	-0.837981	-0.257796	0.0665159	-1.26584	-1.64092	-1.44391	-2.46567	-0.139968	-0.24191	0.272107	0.0821243	-0.119773	-0.767771	-0.287985	-0.20226	-0.203956	-0.161137	-0.394663	-0.0437989	-0.102727	0.278029	-0.163753	0.0696276
GIMEN	-1.25792	-1.29547	-0.172369	-1.22784	-0.585535	-0.921132	-0.0207617	-0.281385	-1.69278	-0.719574	-2.7254	-0.205911	-0.0991086	-0.242354	0.0249067	0.215747	-0.887508	-0.264049	-0.506472	-0.0651591	-0.250333	-0.0352147	0.135478	0.0338543	-0.111512	0.138431	0.297476
IMR32	-1.45278	-1.50924	-0.108716	-2.11234	-0.385716	-0.589991	-0.140423	-0.88903	-1.41425	-1.45652	-2.47313	0.0305231	0.0677371	-0.0526178	0.0341865	-0.251173	-0.171256	0.0624822	0.0147256	-0.0799935	-0.0688289	0.036409	0.11435	-0.130179	0.0442537	-0.0129199	0.00614817
KELLY	-1.30855	-1.86276	-0.00855155	-1.68507	-0.518268	-0.357935	-0.209892	-0.638176	-2.20826	-1.33603	-2.43856	0.00717025	-0.102616	-0.0689363	-0.0283904	0.320546	-1.14595	-0.479553	-0.163651	-0.00698193	0.00155533	-0.0015896	-0.0964678	-0.109486	-0.100917	0.0262808	-0.0405189
KPNYN	-1.15411	-1.95945	-0.0327642	-2.06475	-0.189405	-0.379334	-0.0676262	-0.887591	-1.53885	-1.38998	-2.46787	-0.0683613	0.123964	0.0719638	0.0200131	0.090538	-0.79862	-0.053921	0.0411802	-0.280778	-0.0775007	0.0940182	-0.156783	-0.183814	0.0161944	-0.11166	-0.272068
KPNYS	-1.43722	-2.00307	-0.0784769	-2.0917	-0.810703	-0.30135	-0.104307	-0.796188	-1.58856	-1.43576	-1.92445	0.0581196	-0.0810648	-0.0208679	-0.0306029	0.0450578	-1.01408	0.0288965	-0.0622879	0.0245658	-0.127819	-0.0468643	0.0141683	-0.0974683	-0.0843694	-0.0833761	-0.0243188
LAN2	-1.18341	-1.09909	-0.012001	-1.95449	-0.680036	-0.264853	-0.202394	-0.790463	-2.03156	-1.1191	-2.41027	0.0446446	0.0081345	0.0492474	0.146811	0.0992598	-0.561449	-0.0341026	-0.247366	0.0755447	0.118382	0.00372302	-0.217326	-0.176281	0.075306	-0.183133	-0.0986949
LS	-1.39056	-1.90042	-0.12453	-1.57258	-0.69625	-0.677505	0.072667	-0.215413	-1.696	-1.20032	-2.24327	-0.0874268	-0.0221725	-0.029229	0.215429	-0.161337	-1.24933	-0.406375	-0.148006	-0.392515	-0.186319	0.0877102	-0.0466101	-0.322617	0.0719319	-0.143826	-0.463432
MHHNB11	-1.76704	-1.80295	0.0203461	-1.53664	-0.412819	-0.33401	-0.127257	-0.579722	-1.68748	-1.07933	-2.43458	0.0463993	0.117781	-0.0242599	0.0122651	0.00374271	-0.263557	-0.203819	-0.0946393	-0.241762	-0.00129996	-0.0354356	-0.0080165	-0.0553445	-0.048935	0.0271622	-0.0283221
NB1	-1.16592	-1.29785	0.0503092	-1.52012	-0.704554	-0.445628	-0.330642	-1.11634	-1.86541	-1.11324	-2.41802	-0.0380605	0.174185	-0.0765052	0.0274586	-0.155205	-0.74577	-0.643527	-0.118294	0.0840727	0.0968426	0.0531903	0.0554047	-0.316137	-0.0808323	-0.144109	0.151025
NB10	-1.3136	-1.82495	-0.0954835	-1.84118	-0.474712	-0.574384	0.0290912	-0.585743	-1.90949	-1.52795	-2.20417	-0.0431053	0.0546846	0.0555456	0.0423758	-0.0115253	-1.00912	0.0443229	-0.100746	-0.0908369	-0.0458215	0.0956114	-0.084889	-0.10298	-0.0378347	-0.0288134	0.00252658
NB13	-1.42674	-1.86398	-0.0329617	-2.01605	-0.551216	-0.293552	-0.143334	-0.857161	-1.51435	-1.22998	-2.5863	-0.173231	-0.124856	0.307672	-0.146913	-0.0477835	-1.17057	0.000646686	-0.0880217	-0.0680868	0.0580437	-0.0731318	-0.00306427	-0.105937	-0.210645	-0.0772665	0.0331129
NB1643	-1.03337	-1.8386	-0.149819	-1.96385	-0.24754	-0.817452	-0.0365134	-0.956778	-1.33335	-1.37225	-2.42473	0.13357	0.108333	-0.0133983	-0.106361	-0.192722	-0.556741	-0.66306	0.119061	-0.286655	-0.0801874	-0.157664	-0.00264846	-0.0667153	-0.0346559	0.0555101	-0.0420425
NB17	-1.27637	-1.97108	0.0318647	-1.84452	-0.623939	-0.727806	0.123043	-1.4174	-1.94678	-1.62514	-2.28525	0.0436716	0.157801	-0.00677799	-0.0499123	-0.204023	-0.887267	-0.152652	-0.0495281	-0.0929189	-0.0856455	-0.154149	0.0535429	-0.180767	-0.0622693	0.00251089	0.01094
NB5	-1.31849	-1.78055	0.076369	-2.05688	-0.950546	-0.374866	-0.352393	-0.372938	-1.82799	-1.3176	-1.72639	-0.116013	0.0968432	0.109899	0.120417	-0.0837634	-1.04192	0.0497897	-0.272943	0.0246109	0.0907404	0.111549	-0.0387896	-0.137018	-0.108045	-0.0410429	-0.0998328
NB6	-1.15725	-2.04052	0.0224648	-2.10232	-0.432138	-0.274913	-0.311429	-0.435943	-1.67887	-1.42115	-2.27864	-0.087501	-0.241718	0.0679431	0.0819609	-0.16604	-0.802986	-0.0775705	-0.141811	-0.0969268	-0.0330304	-0.0509293	-0.0594134	-0.156546	-0.0855202	-0.101331	0.12914
NB69	-1.20307	-1.51018	0.0158028	-1.33475	-0.142213	-0.209049	-0.0447375	-0.919703	-2.11964	-1.33262	-2.11461	0.0156887	0.00378116	0.0100708	0.114763	0.0595131	-1.30158	-0.180128	-0.594746	-0.0988881	-0.0441276	-0.0362415	-0.0728493	-0.0790153	-0.00585669	-0.0787949	-0.136301
NB7	-0.694942	-2.02423	0.0492541	-1.54593	-0.475351	-0.40175	-0.0797126	-0.103538	-2.26823	-1.24428	-2.39673	-0.0196912	-0.0497131	0.150909	-0.200046	-0.314121	-0.991516	-0.128998	-0.0630073	-0.0634137	-0.0173055	-0.0287442	0.0169076	0.00138578	-0.0172514	-0.00145142	-0.0331899
NGP	-1.13369	-1.35978	0.0569044	-2.28726	-0.365398	-0.967805	-0.0570649	-0.0888151	-1.95387	-1.36458	-2.23848	0.0373993	-0.120824	-0.0567231	-0.0432608	-0.0452278	-0.837726	-0.318253	-0.114946	-0.261432	0.0227943	-0.0365535	0.0126054	-0.0279079	-0.160855	-0.037944	-0.103573
NH12	-1.74	-1.96792	-0.0169032	-2.1054	-0.29574	-0.283929	-0.127268	-0.983685	-1.18823	-0.76702	-1.92677	-0.0609214	0.200026	0.0365969	0.0169792	-0.00522273	-0.821864	-0.309017	-0.27578	-0.0287978	0.0267369	0.0666191	-0.000752168	-0.129059	-0.0598884	0.0680803	-0.0645663
SHSY5Y	-1.30517	-1.46304	0.0844526	-1.79421	-0.262792	-0.405697	-0.107713	-0.859687	-1.94237	-1.24103	-2.48827	0.0439837	-0.0439708	0.0867196	-0.112114	-0.16785	-0.769647	-1.21105	-0.176847	0.0713214	-0.0234399	0.101987	0.0315135	-0.0602859	-0.0412279	0.00543611	-0.0278839
SIMA	-1.28857	-1.99513	-0.0150614	-1.63282	-0.165138	-0.4757	0.0597873	-0.594991	-1.8624	-1.39597	-2.429	0.046886	0.0388297	-0.0787179	-0.092379	-0.155245	-1.02965	-0.0761373	-0.078684	-0.384561	-0.224714	0.0183969	-0.120317	0.0278621	-0.0388158	-0.0197914	-0.318505
SKNAS	-1.41141	-2.00796	0.0411953	-1.93299	-0.576455	-0.396757	-0.0459869	-1.05973	-1.89208	-1.35989	-2.45084	-0.100582	-0.016726	0.0614199	0.0262273	-0.0267931	-1.24473	0.0190824	-0.0819853	-0.0610546	0.0767759	-0.00287976	-0.0128457	-0.0704656	-0.101867	-0.00078257	-0.186178
SKNBE2	-1.57277	-1.81604	-0.169567	-1.91479	-0.179924	-0.369911	0.00520386	-0.790939	-1.91678	-1.59677	-2.44233	-0.00612639	0.0240803	-0.0136943	0.0651858	-0.137686	-0.932132	-0.166427	-0.0615281	-0.0993492	-0.0216068	0.0270154	-0.00248646	-0.129195	-0.0222828	-0.0531414	-0.0840789
SKNDZ	-1.55066	-2.06949	0.0470956	-2.02753	-0.531122	-0.656754	-0.0952677	-1.00172	-1.72545	-1.62174	-2.26016	-0.096298	-0.138239	0.093583	-0.186783	-0.183413	-1.21523	-0.0592181	-0.0739302	-0.186514	-0.118555	0.0688056	-0.0484503	-0.190654	-0.116672	-0.116761	-0.10019
SKNFI	-1.38832	-2.00903	-0.0671825	-2.08319	-0.908461	-0.609458	0.14259	-0.999267	-1.48097	-1.16918	-2.3141	-0.106495	-0.122209	0.126794	0.0471844	0.0671372	-1.14922	-0.0108325	-0.149869	-0.0935937	-0.050552	0.144641	-0.00694095	-0.179557	-0.0567386	-0.339604	-0.263385
SKNSH	-0.329689	-2.42689	-0.0204826	-0.839366	0.063902	-0.273094	-0.203019	-0.353311	-2.55033	-1.48519	0.515566	-0.0363755	0.320864	0.0319118	-0.158289	-0.139651	-1.33211	-0.444708	-0.422801	0.0627885	-0.25728	-0.15829	0.143177	-0.252537	-0.233544	-0.194124	-0.0824548
TGW	-1.49574	-1.89286	0.0486033	-2.15033	-0.69212	-1.08971	-0.0711586	-1.35407	-1.86799	-1.44061	-2.29391	0.041108	0.0684877	-0.0217275	-0.0173277	-0.145716	-0.913966	-0.416928	-0.0596475	-0.000750002	0.0561086	0.0430727	0.0369806	-0.0780242	-0.0435605	0.0292252	-0.0267615
TN2	-1.56077	-2.10873	-0.0804644	-2.04161	-0.44694	-0.533755	-0.0573487	0.0102047	-1.84417	-1.59879	-2.21366	-0.0389358	-0.0575003	-0.149711	-0.0186398	-0.0950556	-1.28676	-0.0141178	-0.0323595	-0.137737	0.0152848	0.00011959	0.00984382	-0.127184	-0.0438333	0.035139	-0.00409992
Dependent	2	0	19	1	33	33	26	27	0	2	0	20	17	16	16	26	18	26	30	27	22	15	21	30	29	24	25
highly dependent	32	34	0	34	0	1	0	6	34	32	33	0	0	0	0	0	16	2	0	0	0	0	0	0	0	0	0
non-dependent	0	0	15	0	1	0	8	1	0	0	1	14	17	18	18	8	0	6	4	7	12	19	13	4	5	10	9
% Dependent cell lines	5.88235	0	55.8824	2.94118	97.0588	97.0588	76.4706	79.4118	0	5.88235	0	58.8235	50	47.0588	47.0588	76.4706	52.9412	76.4706	88.2353	79.4118	64.7059	44.1176	61.7647	88.2353	85.2941	70.5882	73.5294
% Highly dependent cell lines (<-1)	94.1176	100	0	100	0	2.94118	0	17.6471	100	94.1176	97.0588	0	0	0	0	0	47.0588	5.88235	0	0	0	0	0	0	0	0	0
non-dependent cell lines	0	0	44.1176	0	2.94118	0	23.5294	2.94118	0	0	2.94118	41.1765	50	52.9412	52.9412	23.5294	0	17.6471	11.7647	20.5882	35.2941	55.8824	38.2353	11.7647	14.7059	29.4118	26.4706

## Sheet: RB
Supplementary table BB: Dependency of tumor cell lines on the indicated kinases retrieved from de DepMap. Scores with negative values mark those cell lines where the given gene is especially important for growth or survival.
	Dependency scores
Cell line	AURKA	AURKB	AURKC	CDK1	CDK2	CDK4	CDK5	CDK6	CDK7	CDK9	PLK1	AKT1	AKT2	AKT3	GSK3A	GSK3B	MTOR	ALK	EGFR	FGFR1	FGFR2	FGFR3	FGFR4	KDR	MET	RET	MAPK1
WERIRB1	-1.37375	-1.6886	0.120902	-2.1309	-0.486111	-0.400068	-0.0847013	-0.172899	-1.80552	-1.69622	-2.40951	0.125537	-0.0285999	-0.234047	0.0159546	-0.256863	-0.769648	-0.159074	0.0164972	-0.0191748	-0.0979649	0.0541666	0.15865	0.0607578	-0.00506832	-0.028074	-0.013691
Y79	-1.54098	-2.3017	0.0542582	-2.10436	-0.466355	-0.267878	-0.0512628	-0.042731	-1.93284	-1.7657	-2.32464	0.00377525	0.0227766	-0.16926	-0.0369691	-0.147141	-1.33804	-0.125157	-0.156025	-0.0256093	-0.0689554	0.0915486	-0.0460299	0.0168136	-0.0265187	0.0222618	-0.111339
Dependent	0	0	0	0	2	2	2	2	0	0	0	0	1	2	1	2	1	2	1	2	2	0	1	0	2	1	2
highly dependent	2	2	0	2	0	0	0	0	2	2	2	0	0	0	0	0	1	0	0	0	0	0	0	0	0	0	0
non-dependent	0	0	2	0	0	0	0	0	0	0	0	2	1	0	1	0	0	0	1	0	0	2	1	2	0	1	0
% Dependent cell lines	0	0	0	0	100	100	100	100	0	0	0	0	50	100	50	100	50	100	50	100	100	0	50	0	100	50	100
% Highly dependent cell lines (<-1)	100	100	0	100	0	0	0	0	100	100	100	0	0	0	0	0	50	0	0	0	0	0	0	0	0	0	0
non-dependent cell lines	0	0	100	0	0	0	0	0	0	0	0	100	50	0	50	0	0	0	50	0	0	100	50	100	0	50	0

## Sheet: RMS
Supplementary table BB: Dependency of tumor cell lines on the indicated kinases retrieved from de DepMap. Scores with negative values mark those cell lines where the given gene is especially important for growth or survival.
	Dependency scores
Cell line	AURKA	AURKB	AURKC	CDK1	CDK2	CDK4	CDK5	CDK6	CDK7	CDK9	PLK1	AKT1	AKT2	AKT3	GSK3A	GSK3B	MTOR	ALK	EGFR	FGFR1	FGFR2	FGFR3	FGFR4	KDR	MET	RET	MAPK1
CW9019	-1.36913	-1.90582	0.0257379	-2.07044	-0.570009	-0.50253	0.0571307	-1.00272	-1.84272	-1.34566	-2.30291	-0.415093	-0.193738	-0.0603036	0.240923	0.128098	-1.25993	-0.00785014	-0.026616	-0.0653293	-0.104463	-0.0516776	-0.202612	-0.105054	-0.0872573	0.15096	-0.296532
JR	-1.11834	-1.83521	-0.0201273	-1.9251	-0.317125	-0.216263	0.0197701	-0.481827	-1.87113	-1.46823	-1.61742	-0.128112	-0.0533104	-0.208054	0.166729	0.146963	-0.886865	0.0242421	-0.0972023	0.00911585	-0.050371	-0.0426213	-0.523005	-0.0518518	-0.105395	0.00822535	-0.0557111
RD	-1.2087	-1.79923	-0.0583543	-1.42055	-0.451125	-0.72716	-0.0513463	-0.743198	-1.82249	-1.64344	-2.51912	-0.0327466	0.110525	0.214279	0.128458	0.209696	-1.09358	-0.0569551	0.12489	-0.137884	-0.0434152	0.0671907	0.0583963	-0.0941234	-0.0240264	0.00324139	-0.376403
RH28	-1.67022	-1.49027	-0.0449624	-2.24395	-0.896615	-0.554272	-0.153595	-1.14354	-1.93137	-1.4251	-2.39612	-0.174865	-0.0727671	0.0644428	0.199645	-0.0312461	-0.580901	-0.149284	-0.104796	0.096774	0.0476894	-0.168201	-0.181995	0.0183686	-0.0767033	0.000945158	0.171584
RH30	-1.57921	-1.2565	-0.112843	-1.80659	-0.665511	-1.11608	-0.0823562	-0.193539	-2.13636	-1.27647	-2.5193	-0.183536	-0.0846993	-0.0952576	0.136411	-0.188793	-1.05848	0.145453	-0.260255	0.0393623	0.111135	0.344504	-0.145462	-0.179923	-0.0431797	-0.0729879	-0.0523791
RH4	-1.73219	-2.23796	0.0624131	-1.78921	-0.604184	-0.613151	0.0188375	-0.623678	-1.84801	-1.42377	-2.23225	-0.696678	-0.0936009	0.0536414	0.163718	0.094152	-1.1525	0.046205	0.0055065	-0.0339581	-0.086086	0.038651	-0.17423	-0.0408059	-0.118978	-0.0370614	-0.113029
RHJT	-1.47474	-1.74442	0.0449757	-2.02683	-1.19136	-0.235175	-0.0343735	-1.02992	-1.73982	-1.24413	-2.08056	0.0352684	0.0308185	-0.0877007	0.12014	0.0747359	-0.728699	-0.0781972	-0.0111903	0.103441	0.00274663	-0.067548	-0.30683	-0.045901	-0.122807	-0.0302735	0.0745079
RMSYM	-1.10727	-1.53859	-0.122046	-1.71113	-0.622175	-1.05608	-0.201147	-0.997813	-1.94647	-1.60176	-2.16758	-0.257122	-0.051883	0.193412	-0.0668368	-0.0357834	-0.981299	0.0348025	-0.0376115	-0.7418	0.0449297	0.234735	-0.00448719	-0.0565245	-0.299389	-0.00485855	-0.00172931
SCMCRM2	-1.65635	-1.34008	0.0612261	-1.84867	-0.748146	-0.594772	-0.0107302	-1.0816	-1.65819	-1.03189	-2.45998	-0.233073	-0.199527	-0.00563668	0.0858234	0.128737	-0.864926	-0.320237	0.0354935	0.0596406	0.0997902	0.0805474	0.161346	0.00816774	-0.0218789	0.144519	0.184596
SMSCTR	-0.9812	-1.60236	0.186363	-1.79009	-0.857331	-0.281771	-0.0122915	-0.83388	-1.78398	-1.18925	-2.28026	-0.0535254	-0.0103707	-0.0639338	0.157641	-0.127939	-1.08202	-0.0945205	0.022295	0.0908244	0.0209061	-0.058328	0.110312	0.0101349	0.0505848	0.112298	-1.00524
TTC442	-1.40654	-2.13646	-0.0845328	-1.86392	-0.285759	-0.148034	-0.0792062	-0.526913	-2.21396	-1.41199	-2.24213	0.0182979	0.0340619	0.231945	-0.00348487	0.260543	-1.43379	0.0314525	-0.130131	-0.0366332	-0.00650318	0.00217093	-0.0701063	-0.179751	-0.116986	0.035182	-0.148244
HS729	-1.77776	-1.99433	-0.0221064	-2.11915	-0.870111	-0.357894	-0.0624628	0.0854079	-1.88943	-1.17344	-2.38314	-0.169887	0.0239493	0.106364	-0.029984	0.055697	-1.20621	0.0280548	-0.0790137	-0.971595	-0.0230221	-0.0582385	0.0974919	0.0199204	-0.092907	-0.187792	-0.0997072
Dependent	1	0	7	0	11	10	9	7	0	0	0	10	8	6	3	4	5	6	8	6	6	6	8	8	11	5	9
highly dependent	11	12	0	12	1	2	0	4	12	12	12	0	0	0	0	0	7	6	0	0	0	0	0	0	0	0	0
non-dependent	0	0	5	0	0	0	3	1	0	0	0	2	4	6	9	8	0	10	4	6	6	6	4	4	1	7	3
% Dependent cell lines	8.33333	0	58.3333	0	91.6667	83.3333	75	58.3333	0	0	0	83.3333	66.6667	50	25	33.3333	41.6667	50	66.6667	50	50	50	66.6667	66.6667	91.6667	41.6667	75
% Highly dependent cell lines (<-1)	91.6667	100	0	100	8.33333	16.6667	0	33.3333	100	100	100	0	0	0	0	0	58.3333	50	0	0	0	0	0	0	0	0	0
non-dependent cell lines	0	0	41.6667	0	0	0	25	8.33333	0	0	0	16.6667	33.3333	50	75	66.6667	0	83.3333	33.3333	50	50	50	33.3333	33.3333	8.33333	58.3333	25
