# Supplementary material for: Drugging Hijacked Kinase Pathways in Pediatric Oncology: Opportunities and Current Scenario
Source: Pharmaceutics. 2023 Feb 16;15(2):664. doi: 10.3390/pharmaceutics15020664 (PMC9966033; doi:10.3390/pharmaceutics15020664)
Supplement: Supplementary file 1 [file pharmaceutics-15-00664-s001.zip › Supplementary Table S4 - preclinical data.xlsx]

## Sheet: tabela
Supplementary table S4: Kinase selective inhibitors with evidence of preclinical tests in pediatric cancer. The table portrays selective compounds that are already approved by the FDA or those that are considered clinical candidates in the CanSar platform.
	Name	PubChem CID:	Main target	CanSAR Status	Tumor type tested	IC50 (range)	off-tagets	in vitro	in vivo	antiproliferative	inhibits invasion/metastasis	Reference
RTK inhibitor	Erlotinib	176870	EGFR (ERBB1/2)	FDA approved	EPN, NB, OS, MB, RMS, RB	20nM - 1μM	not informed	yes	yes	yes	yes	DOI: 10.1016/bs.podrm.2019.10.004, DOI: 10.1002/pros.20995, DOI: 10.1200/JCO.2007.15.2306
	Vandetanib	3081361	VEGFR2, EGFR, RET	FDA approved	MB	40nM - 1μM	MET	yes	yes	yes	yes	DOI: 10.2165/11209300-000000000-00000; DOI: 10.1517/17425255.2014.885015, DOI: 10.1002/ijc.29974, DOI: 10.1530/ERC-19-0259
	Gefitinib	123631	EGFR	FDA approved	PA, OS	26nM - 9.6μM	not informed	yes	yes	yes	yes	https://doi.org/10.1158/1535-7163.MCT-19-0903, (https://pubmed.ncbi.nlm.nih.gov/12384534/; https://pubmed.ncbi.nlm.nih.gov/10815932/, https://doi.org/10.1002/pbc.20619
	Regorafenib	11167602	VEGFR1-3, EGFR	FDA approved	NR, RMS, OS, MB, EWS	3nM - 967nM	TIE2, PDGFR-β, KIT, RET, RAF	yes	yes	yes	yes	DOI: 10.1007/978-3-319-91442-8_3, https://doi.org/10.1038/s41416-020-0905-8, DOI: 10.1002/pbc.28222
	Dacomitinib	11511120	EGFR, HER2, HER4	FDA approved	MB	6nM - 74nM	not informed	yes	yes	yes	no	doi: 10.1016/j.neo.2018.02.004, DOI: 10.1007/s40265-018-1028-x
	Lapatinib	208908	EGFR, HER2	FDA approved	RMS, NB, EWS	2.08 μM - 10.0 μM	not informed	yes	yes	yes	no	doi: 10.1002/pbc.21989
	Sunitinib	5329102	PDGFR, VEGFR, KIT, Flt-3, and RET	FDA approved	NB, RMS, EWS, EPN, MB, OS	0.1 nM - 1.0 μM	not informed	yes	yes	yes	yes	DOI: 10.1002/pbc.21535, doi: 10.1593/neo.09166, DOI: 10.1002/pbc.21535
	Lenvatinib	9823820	VEGFR1-3, FGFR1-4, PDGFR, KIT, and RET,	FDA approved	EWS, rms, OS	4 nM - 5.2 nM	not informed	not informed	not informed	not informed	not informed	10.1200/JCO.2017.35.15_suppl.10544 ; https://doi.org/10.3389/fimmu.2022.815598 ;https://doi.org/10.3390/cancers14215315 ;https://doi.org/10.1016/j.esmoop.2021.100250 ;10.3390/ijms232213784 ; DOI: 10.1200/JCO.2017.35.15_suppl.10544
	Pazopanib	10113978	VEGFR1, VEGFR2, VEGFR3, PDGFRβ, c-Kit, FGFR1, and c-Fms	FDA approved	OS, EPN, EWS, MB	10 - 146 nM	not informed	yes	yes	not informed	yes	https://doi.org/10.3109/0284186X.2014.948062 Doi: 10.3390/cancers12061519 DOI: 10.1111/cpr.13102 DOI: 10.1158/1535-7163.MCT-17-1185 DOI: 10.2169/internalmedicine.9879-17 DOI: 10.1111/jcmm.17604 DOI: 10.18632/oncotarget.2240
	Sorafenib	216239	FGFR, VEGFR1-3, RAF1	FDA approved	RMS, EPN	1.5 - 3.5μM	Lyn, Yes, Fyn, Lck and Src	yes	not informed	yes	no	DOI: 10.1002/pbc.25548; doi: 10.1371/journal.pone.0122555
	Cabozantinib	2510847	VEGFR2 and MET	FDA approved	OS, EWS, MB	0.035 - 14.3 nM (1.22 - 8.27μmol/L)	KIT, RET, AXL, TIE2, and FLT3	yes	no	yes	ys	https://doi.org/10.1002/ijc.28047; 10.1097/CCO.0000000000000644; 10.1038/s41598-018-22469-5 ; 10.3390/cancers14010070; 10.1007/s00280-015-2871-z; 10.3892/ijo.2016.3792
	Nintedanib	135423438	VEGFR1/2/3, FGFR1/2/3 and PDGFRα/β	FDA approved	EPN, OS, RMS	13 - 69 nM	not informed	yes	no	no	yes	10.1007/s00401-021-02327-x; 10.1016/j.celrep.2018.06.103; 10.1002/1878-0261.13145
	Midostaurin	9829523	PKCα/β/γ, Syk, Flk-1, Akt, PKA, c-Kit, c-Fgr, c-Src, FLT3, PDFRβ and VEGFR1/2	FDA approved	EWS, OS	22-500 nM	not informed	yes	yes	yes	not tested	10.1002/ijc.27472; https://pubmed.ncbi.nlm.nih.gov/18507025/; 10.1158/1078-0432.CCR-07-4781
	Axitinib	6450551	VEGFR1, VEGFR2, VEGFR3 and PDGFRβ	FDA approved	EPN, MB, NB, GBM	0.1- 1.6 nM	not informed	yes	yes	yes	yes	10.1158/1535-7163.MCT-17-1185; 10.3390/cancers14010070; 10.1038/s41598-021-93586-x; 10.1111/jcmm.13489; 10.3892/ijo.2016.3792; 10.1158/1078-0432.CCR-17-1717; 10.1158/1078-0432.CCR-17-1717
	Ramucirumab	472397511	VEGFR-2	FDA approved	NB, RB, OS, RMS and EWS	not informed	not informed	yes	yes	yes	not tested	10.18632/oncotarget.27148
	Alectinib	49806720	ALK	FDA approved	NB, RMS	1 - 3.5 nM	ALK F1174L and ALK R1275Q	yes	yes	yes	yes	10.3389/fonc.2019.00579; 10.1111/bph.14067; 10.1016/j.canlet.2017.04.022; 10.21873/anticanres.13504; 10.18632/oncotarget.13541
	AEE-788	10297043	EGFR and ErbB2	Clinical promise	EPN, GBM	2 - 6 nM	AKT and ERK	yes	yes	yes	not tested	10.1002/ijc.27377; 10.3892/ijmm_00000518; 10.1158/1535-7163.MCT-06-0566
	Crizotinib	11626560	ALK, c-Met ROs,	FDA approved	EPN, EWS, RMS, GBM, NB, MB	8-24 nM (1.22 - 3.59 μmol/L)	not informed	yes	yes	yes	yes	https://doi.org/10.1002/ijc.28047
	Capmatinib	25145656	c-Met	FDA approved	EWS, OS, GBM	0.13 nM	ERK1/2, AKT, FAK, GAB1, STAT3/5	yes	yes	no tested	no tested	https://doi.org/10.1111/cas.13956; https://doi.org/10.1158/1078-0432.CCR-11-1157
	Tepotinib	25171648	MET	FDA approved	NB	not informed	not informed	not informed	not informed	not informed	not informed	https://doi.org/10.1016/j.phrs.2021.106037; https://doi.org/10.1007/s40265-020-01317-9
	PF-04217903	17754438	MET	Clinical promise	OS	4.8 nM	not informed	no	yes	yes	yes	DOI:10.1200/jco.2010.28.15_suppl.9567
	Tivantinib	11494412	MET	Clinical promise	MB, EPN, EWS, OS, RMS, WT, NB	20 - 50 nM	not informed	not tested	not tested	not tested	not tested	doi: 10.1002/pbc.26565
	Lorlatinib	71731823	ALK	FDA approved	NB, GBM	0.2 - 10 nmol/L	ROS1	yes	yes	yes	not informed	DOI: 10.1158/2159-8290.CD-15-1056, DOI: 10.1158/2159-8290.CD-15-1056
	Ceritinib	57379345	ALK	FDA approved	NB, GBM, OS, RMS	0.3 - 1 µM	IGFR, INSR, MET	yes	yes	yes	no	doi: 10.1093/neuonc/noy059.229; https://doi.org/10.1038/nature16546, https://doi.org/10.1080/15384047.2018.1491498, https://doi.org/10.3390/cancers12040793, https://doi.org/10.1007/s11523-017-0528-z, https://doi.org/10.1097/CAD.0000000000000552
	Brigatinib	68165256	ALK	FDA approved	NB, GBM	75 - 100 nM	EGFR	yes	yes	yes	not informed	doi: 10.18632/oncotarget.8508
	Entrectinib	25141092	TrkA, TrkB, TrkC,	FDA approved	NB	not informed	ROS1, ALK	yes	yes	yes	not informed	DOI: 10.1016/j.canlet.2016.01.018
	X-396	56960447	ALK/MET	Clinical promise	NB	0.16 nM	not informed	yes	yes	yes	not informed	DOI: 10.1158/0008-5472.CAN-10-3879, https://doi.org/10.1158/1538-7445.AM2017-CT151, DOI: 10.18632/oncotarget.4342
	Erdafitinib	67462786	FGFR1/2/3/4	FDA approved	NB, MB	0.72 - 5.93 nM	not informed	yes	yes	yes	not informed	https://doi.org/10.3390/molecules26237069), https://doi.org/10.3892/ijo.2021.5167, https://doi.org/10.1158/1535-7163.MCT-16-0589, (https://doi.org/10.3389/fonc.2021.748657
	Pazonib / Pazopanib	10113978	VEGFRs AND PDGFs	FDA approved	OS, EWS, RMS, NB, MB	10 - 47 nM	not informed	Yes	Yes	Yes	Yes	0012-6667/11/0004-0443/$55.55/0
	Erdatinib / Erdafitinib	67462786	FGFRs and VEGFR2	FDA approved	OS, EWS, RMS, NB	0.24 - 36.8 nmol/L	not informed	Yes	Yes	Yes	Yes	doi: 10.1007/s40265-019-01142-9
	DOVITINIB	135398510	FGFRs, VEGFR and PDGFR	Clinical promise	EPN, RMS	2.03 - 1.08 μM	not informed	Yes	Yes	Yes	not informed	doi: 10.1007/s00401-021-02327-x
	MASITINIB	10074640	KIT	Clinical promise	GBM	40 - 200 nM	PDGFRα/ß, FGFR3 and FAK	Yes	Yes	Yes	not informed	doi:10.1371/journal.pone.0007258
PI3K/AKT/mTOR pathway inhibitors	Everolimus	6442177	mTOR1	FDA approved	DIPG and HGG	0.05 - 3.6 nM	not informed	Yes	Yes	Yes	not informed	doi: 10.1517/13543784.11.12.1845
	Palomid-529/RES-529	11998575	mTOR1 and mTOR2	Clinical promise	OS	20 - 30 nM	VEGF and FGF	Yes	Yes	Yes	not informed	doi:10.1158/0008-5472.CAN-08-2058.
	OSI-027	135398516	mTOR1 and mTOR2	Clinical promise	MB, EWS and RMS	4 - 65 nM	PI3Kα	Yes	Yes	Yes	not informed	doi:10.2174/092986711796391651
	VS-5584	46912230	PI3K and mTOR	Clinical promise	OS and NB	16 - 37 nM	MAPK	Yes	Yes	Yes	Yes	doi: 10.1158/1535-7163.MCT-12-0466
	VISTUSERTIB	25262792	mTOR	Clinical promise	NB	2.81 nM	not informed	Yes	Yes	Yes	not informed	doi: 10.1038/s41598-020-77788-3
	DACTOLISIB (BEZ235)	11977753	PI3K and mTOR	Clinical promise	EWS, MB, OS, RB, RMS	6 - 500 nmol/L	EWS/FLI1	Yes	Yes	Yes	Yes	https://doi.org/10.18632/oncotarget.16970; (ttps://doi.org/10.1158/1078-0432.CCR-09-0816); (10.18632/oncotarget.5000);
	SF-1126	92043140	all isoforms of PI3K and other members	Clinical promise	EWS, NB	4.3 - 19.9 μM	not informed	Yes	Yes	Yes	not informed	10.1097/MPH.0000000000002054; https://doi.org/10.18632/oncotarget.13386
	TRICIRIBINE	65399	AKT-1, -2, and -3	Clinical promise	OS	1 - 100 μmol/l	not informed	Yes	Yes	Yes	Yes	https://doi.org/10.1158/1535-7163.MCT-20-0369
	SAPANISERTIB	45375953	TORC1 and TORC2	Clinical promise	GB, EWS, MB, OS, RB, RMS	2 - 500 nM	AKT	Yes	Yes	Yes	Yes	https://doi.org/10.1016/j.canlet.2017.04.019; https://doi.org/10.1007/s10495-014-1066-0; https://doi.org/10.1002/prp2.930; https://doi.org/10.1016/j.canlet.2021.02.001; https://doi.org/10.1158/1535-7163.MCT-14-0711; https://doi.org/10.1016/j.bbrc.2015.10.119
	LY-2090314	10029385	GSK-3	Clinical promise	NB	20 - 1000 nM	not informed	Yes	No	Yes	Not informed	10.1186/s12885-018-4474-7
	TIDEGLUSIB	11313622	GSK3B	Clinical promise	NB, OS, RMS	4 - 60 uM	not informed	Yes	Yes	Yes	Not informed	https://doi.org/10.1016/j.bbrc.2020.12.055; https://doi.org/10.1007/s43440-020-00162-7; https://doi.org/10.18632/oncotarget.18520
	MK-2206	24964624	AKT	Clinical promise	OS, NB	8.75 - 17.35 uM	not informed	Yes	Yes	Yes	Not informed	https://doi.org/10.1002/pbc.23412; 0.1158/1078-0432.CCR-11-3321
	IPATASERTIB	24788740	AKT	Clinical promise	RMS, OS	0.62 - >10 uM	not informed	Yes	No	Yes	Not informed	10.1101/mcs.a006140
MAPK pathway inhibitors	Sorafenib	216239	PI3K	FDA approved	GB, EWS, OS, MB, NB	0.4 - 580 nM	NF-kB	Yes	Yes	Yes	Not informed	https://doi.org/10.1016/j.molonc.2014.05.016; https://doi.org/10.3390/ijms232213784; https://doi.org/10.1111/jcmm.17604; 10.1097/CAD.0000000000000552; https://doi.org/10.1371/journal.pone.0122555; https://doi.org/10.1002/pbc.24004
	Regorafenib	11167602	VEGFR2, VGFR3, RET, KIT, and RAF	FDA approved	MB, EWS, NB, OS, RMS	0.7 - 28 μmol/L	not informed	Yes	Yes	Yes	not informed	https://doi.org/10.1371/journal.pone.0142612; https://doi.org/10.1371/journal.pone.0142612; https://doi.org/10.18632/oncotarget.22011; https://doi.org/10.1002/pbc.28222
CDK inhibitors	RIVICICLIB	9952923	CDK9-cyclinT1, CDK4-cyclin D1, and CDK1-cyclinB	Clinical promise	NB	20 - 79 nM	not informed	yes	not tested	not informed	not informed	10.3389/fonc.2021.709525
	SB-1317	16739650	CDK/JAK2/FLT3	Clinical promise	PA	13 - 56 nM	not informed	yes	not tested	not informed	not informed	10.1158/1078-0432.CCR-20-4730
	MILCICLIB	16718576	CDK	Clinical promise	MB, Glioma	1.5 – 2.5 μM	TRK	yes	yes	yes	not tested	https://doi.org/10.1111/bph.12112
	TERAMEPROCOL	476861	lipoxygenase inhibitor/ CDK1	Clinical promise	GBM	64.27 - 171.39 μM	not informed	yes	not tested	yes	not tested	10.1007/s10637-012-9917-4
	UCN-01	72271	CDKs	Clinical promise	OS, GBM, NB	20 - 400 nM	not informed	yes	not tested	yes	yes	https://doi.org/10.1111/j.1471-4159.2004.02543.x; https://doi.org/10.1111/j.1745-7254.2005.00087.x; 10.3171/jns.1996.84.6.1024; 10.1002/jcb.26652
	BMS-387032/ SNS-032	3025986	CDK2/7/9	Clinical promise	OS, Glioma, NB	14.6 nM - 0.5 µM	not informed	yes	yes	yes	yes	https://doi.org/10.4161/cc.7.24.7345 ; 10.1593/neo.07136 ; https://doi.org/10.3892/ijo_00000231 ; 10.1593/tlo.13544; 10.18632/oncotarget.11160;
	SELICICLIB	160355	CDKs	Clinical promise	EwS, OS, NB	5 μmol/L - 200µM	not informed	yes	yes	yes	no tested	https://doi.org/10.1158/0008-5472.CAN-05-1276; https://doi.org/10.1101/2020.12.07.415612; https://doi.org/10.1158/0008-5472.CAN-06-2086; https://doi.org/10.1002/jcp.24234; 00001756-199908200-00023; https://doi.org/10.1007/s10637-009-9254-4; htps://doi.org/10.3892/or.2015.4105; 10.1073/pnas.1202492109; https://doi.org/10.1038/sj.onc.1207025; https://doi.org/10.1177/19476019103698; https://doi.org/…
	RIBOCICLIB	44631912	CDK4/6	FDA approved	NB, EWS	0-10.000 nmol/L	cyclin B/CDK1 complex	yes	yes	yes	no tested	10.1158/1078-0432.CCR-16-1114; 10.1158/1078-0432.CCR-16-2898; 10.1038/s41598-022-16455-1; 10.1158/1078-0432.CCR-16-1131: https://doi.org/10.1007/s11060-020-03641-2; https://doi.org/10.1016/j.ejmech.2017.12.003; https://doi.org/10.1016/j.bmcl.2019.06.021; https://doi.org/10.1007/s11060-020-03641-2; 10.1158/1078-0432.CCR-19-0133; 10.1007/s11060-019-03258-0; 10.1007/s00280-019-03864-9; 10.1093/noajn…
	PALBOCICLIB	5330286	CDK4/6	FDA approved	EPN, EwS, OS, Glioma. NB	10 nM - 10 μM	not informed	yes	yes	yes	yes	10.18632/oncotarget.9879; 10.18632/oncotarget.23509; https://doi.org/10.1002/pbc.28879; https://doi.org/10.1016/j.bbadis.2018.02.004; 10.1038/s41420-021-00423-1; 10.1016/j.ebiom.2019.04.043; https://doi.org/10.1007/s12035-019-1633-z; 10.1038/s41467-021-27502-2; 10.1038/s41598-019-45571-8; 10.1186/s12935-015-0224-y
	ABEMACICLIB	46220502	CDK4/6	FDA approved	EPN, RMS, EwS, OS, Glioma, NB	4nM - 20 µM	AKT, ERK e RB	yes	yes	yes	yes	10.3390/cancers12123597; https://doi.org/10.1016/j.ccell.2018.07.012; 10.1158/1078-0432.CCR-18-1256; 10.1007/s00280-021-04363-6; 10.1111/jcmm.15156; 10.1038/s41420-021-00423-1; 10.3390/jpm10040290; doi.org/10.1016/j.ejca.2020.10.009; 10.1038/s41598-022-16455-1
	AT-7519	11338033	CDK1/2/4/6/9	Clinical promise	NB	386 nmol/L - 1227 nmol/L	not informed	yes	yes	not informed	-	10.1158/1078-0432.CCR-15-0313
PLK1 inhibitors	NMS-1286937	49792852	PLK1	Clinical promise	OS, MB	4.9 - 27.9 nM	not informed	yes	yes	yes	no tested	DOI: 10.1007/s10637-014-0158-6, doi: 10.1093/neuonc/noab207
	BI-2536	11364421	PLK1	Clinical promise	OS, MB, GBM, RMS, NB	10 - 100nM	not informed	yes	yes	yes	yes	doi: 10.1089/cbr.2012.1415, DOI: 10.1038/cgt.2013.46, (DOI: 10.2174/1871520617666170213112904, DOI: 10.1186/1471-2407-12-80, DOI: 10.1158/0008-5472.CAN-12-4331, doi: 10.1167/iovs.13-12618, DOI: 10.7150/jca.33110,DOI: 10.1158/1078-0432.CCR-10-1129, doi: 10.1016/j.canlet.2015.04.011, doi: 10.1158/0008-5472.CAN-10-2484, DOI: 10.3390/ph15010037,DOI: 10.1097/CAD.0b013e32834a16d4), DOI: 10.1097/CAD.0b0…
	GSK-461364	15983966	PLK1	Clinical promise	NB, MB, OS	<50 nM	PLK2, PLK3	yes	yes	yes	yes	doi: 10.18632/oncotarget.14268,https://doi.org/10.3892/ijo.2016.3352, doi: 10.2174/1871520617666170213112904, https://doi.org/10.3892/ijo.2016.3352, DOI: 10.1097/CAD.0000000000000157, DOI: 10.2174/1871520617666170213112904, doi: 10.18632/oncotarget.14268
	VOLASERTIB	10461508	PLK1	Clinical promise	RMS, OS, NB, GBM, MB	6 - 135 nM	not informed	yes	yes	yes	yes
In the literature there is no evidence of preclinical tests in pediatric cancer for the following inhibitors: Afatinib (EGFR, HER2, HER4); Osimertinib (EGFR); Neratinib (HER2); Panitumumab (EGFR); Necitumumab (EGFR); JNJ-26483327(EGFR); AV9 (VEGFR-1, VEGFR-2, VEGFR-3); ZD-4190 (VEGFR2 and EGFR); Selpercatinib (RET); Amuvatinib (c-Kit, PDGFRα, Flt3, c-Met and c-Re); Cetuximab (EGFR); Amivantamab (…
