# Supplementary material for: Drugging Hijacked Kinase Pathways in Pediatric Oncology: Opportunities and Current Scenario
Source: Pharmaceutics. 2023 Feb 16;15(2):664. doi: 10.3390/pharmaceutics15020664 (PMC9966033; doi:10.3390/pharmaceutics15020664)
Supplement: Supplementary file 1 [file pharmaceutics-15-00664-s001.zip › Supplementary Table S5 - Clinical trials.xlsx]

## Sheet: final
Supplementary Table S5: Information about kinase inhibitors under clinical trials in the pediatric setting. OSR: overall survival rate, EFS: event free survival, PFS: progression-free survival, ORR: objective response rate; CR: complete responde, PR: partial responses, SD: stable disease, DP: disease progression, ORR: overall response rate. TTR: time to respond. DoR: duration of response, DLT: Do…
Drug Name	NCT number	Population	N	Phase	Cancer type	Dose	Type of treatment	Survival	Response	Adverse Reactions	Reference
Alectinib	-	6-70 yrs	10	Phase II	Relapsed or refractory ALK-positive anaplastic large cell lymphoma	300 mg	Twice a day.	PFS at 1 yr was 58,3%, EFS was 70% and OSR 70%	6/10 CR, 2/810 PR. Favorable clinical activity and was well tolerated in patients with ALK-positive ALCL who had progressed on standard chemotherapy	Grade 3 and higher AE was a decrease in neutrophil count in two patients	10.1111/cas.14671
Alisertib - MLN8237	NCT01154816	1-22 yrs	139	Phase II	Solid Tumors or Leukemia	80 mg/m2/dose	Orally, daily for 7 days every 21 days	-	The median alisertib trough concentration on day 4 was 1.3 μmol/L, exceeding the 1 μmol/L target trough concentration in 67% of patients	Most frequent AEwas myelosuppression	10.1158/1078-0432.CCR-18-2675
	-	<22 yrs	37	Phase I	Refractory/recurrent Solid tumors	45, 60, 80, and 100 mg/m(2)/day	Once daily or divided twice daily for seven days, every 21 days	-	1/37 PR, 6/33 prolongate SD	Myelosuppression was dose limiting in three of four patients at 100 mg/m(2), and one of six patients had dose-limiting mood alteration at 80 mg/m(2). At 45 mg/m(2), one of six patients experienced dose-limiting mucositis. Mucositis and myelosuppression were dose limiting at 80 mg/m(2) on the twice-daily schedule, and one of five patients at 60 mg/m(2) on the twice-daily schedule experienced a dos…	10.1158/1078-0432.CCR-11-3251
Apatinib	NCT03359018	>8 yrs	43	Phase II	Advanced Osteosarcoma	500 mg	500 mg apatinib orally once daily plus 200 mg camrelizumab by intravenous infusion every 2 weeks until disease progression or unacceptable toxicity	FPS at 6-month was 50.9% (95% CI 34.6%, 65.0%)	ORR was 20.9% (9/43) and two patients with durable disease control were observed.	Toxic effects led to dose reductions, or interruptions, or both in 24 (55.8%) of 43 patients and permanent discontinuation in 4 (9.3%) patients.	10.1136/jitc-2020-000798
AT9283	CR0708-11, EudraCT 2008-005542-23	2-19 yrs	33	Phase I	Solid tumors	7, 9, 11.5, 14.5, 18.5, and 23 mg/m(2)/d	72-hour continuous intravenous infusion every 3 weeks	One patient with central nervous system-primitive neuroectodermal tumor (CNS-PNET) achieved a partial response after 16 cycles and 3 cases were stable for four or more cycles.	MTD was 18.5 mg/m(2)/d	6/33 had dose-limitng toxicities. Most common AE were hematologic (neutropenia, anemia, and thrombocytopenia in 36.4%, 18.2%, and 21.2% of patients), which were grade ≥3 in 30.3%, 6.1%, and 3% of patients. Nonhematologic toxicities included fatigue, infections, febrile neutropenia and ALT elevation.	10.1158/1078-0432.CCR-14-1592
	NCT01431664	1–18 yrs	7	phase I/II	relapsed or refractory acute leukemia	9,14.5 and 23 mg/m2	Daily, 1 cycle	-	No CR.	29 AEs were reported, 5/7 had serious AE. 1 death by DP.	10.1002/pbc.26351
Axitinib (INLYTA™)	NCT02164838	5-17 yrs	19	Phase I	Refractory solid tumors	2.4 and 3.2 mg/m2/dose	Oral, twice daily	-	5/19 achieved SD,1/19 achived PR. Maximum tolerated and recommended dose of axitinib appears to be 2.4 mg/m2 /dose	2/19 had dose-limiting toxicities (palmar-plantar erythryodysesthesia syndrome in 1 patient and intratumoral hemorrhage in 1 patient). >20% had grade 1 to 2 toxicities during cycle 1 included anemia, anorexia, fatigue, diarrhea, nausea, and hypertension. Nonhematological toxicities of grade ≥3 in subsequent cycles included hypertension and elevated serum lipase	10.1002/cncr.31725
	NCT02636725	≥16 yrs	36	Phase II	Advanced sarcomas including alveolar soft-part sarcoma	2-10 mg	Axitinib 5 mg orally twice daily and pembrolizumab 200 mg intravenously for 30 min on day 8 and every 3 weeks for cycles of 6 weeks for up to 2 years. Thereafter, patients received escalating doses of axitinib (2–10 mg) plus flat dose pembrolizumab.	PFS at 3 month was 65·6% (95% CI 46·6–79·3), and 72·7% (95% CI 37·1–90·3) for alveolar soft-part sarcoma	-	Most common grade 3 or 4 AE: hypertension (five [15%] of 33 patients), autoimmune toxicities (five [15%]), nausea or vomiting (two [6%]), and seizures (two [6%]). Serious AE in seven (21%) patients: autoimmune colitis, transaminitis, pneumothorax, haemoptysis, seizures, and hypertriglyceridemia. There were no treatment-related deaths.	10.1016/S1470-2045(19)30153-6
Cabozantinib	NCT03690388	≥12 yrs	-	-	Advanced or metastatic differentiated Thyroid Cancer	60 mg	Orally, once daiily	Median PFS was 11 months [95% (CI), 7.4–13.8] in the cabozantinib arm compared with 1.9 months (95% CI, 1.9–3.7) in the control arm, with an HR of 0.22 (95% CI, 0.15–0.31).	-	New AE: hypocalcemia	10.1158/1078-0432.CCR-22-0873
	NCT02243605	≥12 yrs	90	Phase II	Advanced Ewing Sarcoma or Osteosarcoma	Adults 60 mg, children [<16 years] 40 mg/m2	Orally once daily in 28-day cycles until disease progression, unacceptable toxicity, the investigator's decision to discontinue, or participant withdrawal	-	10/39 EWS , 5/42 OS had PR by 6 mnths. 14/42 OS had 6 months non progression	Mmost common grade 3 or 4 aAE were hypophosphataemia (five [11%] for Ewing sarcoma, three [7%] for osteosarcoma), aspartate aminotransferase increase (two [4%] for Ewing sarcoma, three [7%] for osteosarcoma), palmar-plantar syndrome (three [7%] for Ewing sarcoma, two [4%] for osteosarcoma), pneumothorax (one [2%] for Ewing sarcoma, four [9%] for osteosarcoma), and neutropenia (two [4%] for Ewing …	10.1016/S1470-2045(19)30825-3
	NCT02101736	16–34 years	40	Phase II	Neurofibromatosis type 1 (NF1) plexiform neurofibromas (PNs)	40 -60 mg	Started on 40 mg cabozantinib daily for the first two cycles and then escalated to 60 mg daily for the remaining cycles	-	≥25% of patients achieving PR afetr 12 cycles.	Nine patients required dose reduction or discontinuation of therapy due to AEs; common AEs included gastrointestinal toxicity, hypothyroidism, fatigue and palmar plantar erythrodysesthesia. A total of 11 grade 3 AEs occurred in eight patients.	10.1038/s41591-020-01193-6
Ceritinib	NCT01742286	1-18 yrs	83	Phase I	Locally advanced or metastatic ALK (anaplastic lymphoma kinase)-positive malignancies	starting dose in the fasted state was 500 mg/m2	One daily	-	An OR was recorded in six (20%; 95% CI 8-39) of 30 patients with neuroblastoma, seven (70%; 33-93) of ten patients with IMT, six (75%; 35-97) of eight patients with ALCL, and one (14%; <1-58) of seven patients with other tumours.	All patients had at least one AEt. Grade 3 or 4 adverse events occurred in 67 (81%) of 83 patients and were mostly increases in aminotransferases (alanine aminotransferase increase in 38 [46%] patients and aspartate aminotransferase increase in 27 [33%] patients). At least one serious AE was reported in 40 (48%) of 83 patients and 31 (37%) of 83 patients had at least one grade 3 or 4 serious AE 1…	10.1016/S1470-2045(21)00536-2
Crizotinib	NCT01524926	6 -48 yrs	13	Phase II	Advanced/metastatic Alveolar rhabdomyosarcomas	250 mg	BID	1/13 had PR, ORR was 14.3%; 95% [CI]: 0.3-57.8	ORR: 14.3%; 95% confidence interval [CI]: 0.3-57.8)	Main AE were fatigue (5/13 [38.5%]), nausea (4/13 [30.8%]), anorexia (4/13 [30.8%]), vomiting (2/13 [15.4%]) and constipation (2/13 [15.4%]). All 13 treated patients died early because of progressive disease.	10.1016/j.ejca.2018.02.011
	NCT00939770	1.1-21.4 yrs	79	Phase I	Solid or CNS tumours, or anaplastic large-cell lymphoma	100, 130, 165, 215, 280, 365 mg/m(2) per dose	15–28 of continuous twice daily dosing	-	9/79 had CR, 5/79 had PR.	Grade 4 AE in cycle 1 were neutropenia (two) and liver enzyme elevation (one). Grade 3 adverse events that occurred in more than one patient in cycle 1 were lymphopenia (two), and neutropenia (eight)	10.1016/S1470-2045(13)70095-0
	NCT019795360	1- 22 yrs	30	Phase II	Anaplastic large cell lymphomas and inflammatory myofibroblastic tumors	100-280 mg/m2	orally twice daily	-	For ALC: ORR for 83% for 165mg and 90%, 280 mg; CR in 5/6 ALCL at 165mg, and 80% 5/14 at 280mg; . For IMT ORR was 86%, CR was 5/14 and PR was 7/14 .	Most common AE was decrease in neutrophil count: ALCL in 33% as 165mg and 70% at 280mg; and in 43% of patients with IMT. Levels of NPM-ALK decreased during therapy in most patients with ALCL.	10.1200/JCO.2017.73.4830
	NCT01644773	2.9-21.3 yrs	36	Phase I	Progressive or recurrent high-grade and diffuse intrinsic pontine gliomas	100–215 mg/m2	Orally once or twice-daily with 100–215 mg/m2 crizotinib and 50–65 mg/m2 dasatinib	-	Crizotinib mean apparent clearance (CL/F) was 66.7 L/h/m2 after single-dose and decreased to 26.5 L/h/m2 at steady state when given alone, but not when combined with dasatinib (mean 60.8 L/h/m2). Overweight/obese patients, who may require a dosing adjustment	-	10.1007/s00280-021-04357-4
Dabrafenib	NCT02684058	1 to <18	110	Phase II	BRAF V600–mutant pediatric low-grade glioma	<12 y, 5.25 mg/kg/d; ≥12 y, 4.5 mg/kg/d	Dabrafenib BID (<12 y, 5.25 mg/kg/d; ≥12 y, 4.5 mg/kg/d) + trametinib once daily (<6 y, 0.032 mg/kg/d; ≥6 y, 0.025 mg/kg/d) or carboplatin + vincristine (standard dosing).	ORR (CR+PR) was 47% (95% CI, 35%-59%) with dabrafenib + trametinib vs 11% (95% CI, 3%-25%) with carboplatin + vincristine (P<.001; odds ratio, 7.2 [95% CI, 2.3-22.4]) Median PFS was 20.1 months (95% CI, 12.8 months) with dabrafenib + trametinib vs 7.4 monts (95% CI, 3.6-11.8 months) with carboplatin + vincristine(P<.001; HR, 0.31 [95% CI, 0.17-0.55]); 12 months Kaplan-Meier PFS rates were 67% vs …	clinical benefit rate (CR+PR+SD ≥24 wk) was 86% (95% CI, 76%-93%) vs 46% (95% CI, 30%-63%)	Fewer grade ≥3 AEs (47% vs 94%) and fewer discontinuations due to AEs (4% vs 18%). Most comum AEs: pyrexia (68% vs 18%), headache (47% vs 27%), and vomiting (34% vs 48%).	https://ascopubs.org/doi/abs/10.1200/JCO.2022.40.17_suppl.LBA2002
	ChiCTR-IPR-14005706	5.2-11.3 yrs	189	Phase III	Philadelphia chromosome–positive acute lymphoblastic leukemia	80 mg/m2	Daily dasatinib (n = 92) or imatinib (n = 97) continuously	4-year EFS was71.0% (95% CI, 56.2%-89.6%) and OSR was 88.4% (95% CI, 81.3%-96.1%) in the dasatinib group vs and 48.9% (95% CI, 32.0%-74.5%; P = .005, log-rank test) and 69.2% (95% CI, 55.6%-86.2%; P = .04, log-rank test) in the imatinib group.	-	No significant differences in the frequency of severe toxic effects between the 2 treatment groups	10.1001/jamaoncol.2019.5868
	NCT01677741	1-18 yrs	32	Phase I/II	BRAF V600 Mutation-Positive Relapsed or Refractory Low-Grade Glioma	3.0 to 5.25 mg/kg	Oral and daily	ORR was 44% [95% confidence interval (CI), 26-62]. 1-year progression-free survival rate was 85% (95% CI, 64-94)	-	29/32 had AE: most common was fatigue (34%). Grade 3/4 treatment-related AEs were reported in 9 patients (28%)	10.1158/1078-0432.CCR-19-2177
Entrectinib	NCT02650401	<22 yrs	43	Phase I/II	Solid or primary CNS tumors harboring NTRK, ROS1, or ALK aberrations	250, 400, 550, 750 mg/m2	Orally, once-daily	-	ORR was 57.7% (95% CI 36.9-76.7), median duration of response was not reached, and median (interquartile range) duration of treatment was 10.6 months (4.2-18.4).	Most common AEwas weight gain (48.8%). Nine patients experienced bone fractures (20.9%).	10.1093/neuonc/noac087
Enzastaurin	NCT01748149	>22 yrs	33	Phase I	refractory primary central nervous system tumors	260, 340, and 440 mg/m(2	Once daily at 3 dose levels (260, 340, and 440 mg/m(2)) and BID at 440 mg/m(2)/da	-	No ORR, 11/30 had SD >3 cycle: 7 gliomas, 2 ependymoma and 2 brainstem glioma	Two participants receiving 440 mg/m(2) given twice daily ehas DLT by grade 3 thrombocytopenia, and grade 3 alanine transaminase elevation that did not recover within 5 days. most commom AE were chromaturia, fatigue, anemia, thrombocytopenia, and nause	10.1093/neuonc/nou114
Erlotinib (Tarceva®)	NCT00602667 and NCT00124657	0.7-19 yrs	47	Phase II	CNS tumor and high-grade glioma or unfavorable low-grade glioma	90 mg/m2	28-day cycles oral erlotinib once daily	-	-	Most AE were were grade 1. No associations were found between drug pharmacokinetics and drug-induced toxicities.	10.1007/s00280-019-03921-3
	-	<21 yrs	19	-	Low-grade gliomas	65 mg/m2	65 mg/m2/day once daily of erlotinib and 0.8 mg/m2/dose twice daily of rapamycin for 28 consecutive days	-	3/6 developed progressive diseases, 2/6 had >1 year disease control	No patient was removed from study due to toxicity	10.1002/pbc.24142
	-	<22 yrs	46	Phase I	Recurrent or refractory CNS tumor, Osteogenic Sarcoma, Rhabdomyosarcoma, Soft Tissue Sarcoma, Neuroblastoma, or Germ cell Tumor	35, 50, 65, 85, or 110 mg/m2	Orally once daily alone in a 28-day course or in combination with temozolomide for 5 days for all subsequent 28-day courses	-	1/46 had SD for 19 months,2/45 remained on study for 23 and 24 months, and one patient with myoepithelioma had a mixed response. DLT: rash and hyperbilirubinemia, whereas one of six patients developed dose-limiting rash at 85 mg/m2/d	Most frequent AE: diarrhea, rash, and hyperbilirubinemia	10.1200/JCO.2007.15.2306
	NCT00418327	1- 21 yrs	51	Phase I	brainstem glioma and relapsing/refractory brain tumors	75, 100, 125, and 150 mg/m2	Daily. Group 1 included patients with refractory or relapsing brain tumors receiving erlotinib alone, and group 2 included newly diagnosed patients with brainstem gliomas receiving radiotherapy and erlotinib.	In group 2, OSR was 12.0 months.	In group 1, 8 of 29 patients (28%) had SD with tumor regression approaching 50% in a malignant glioma and an anaplastic oligoastrocytoma.The RD of erlotinib was 125 mg/m2 per day as monotherapy or in combination with radiotherapy.	230 adverse events in 44 patients were possibly treatment related (216, grades 1 and 2; 9, grade 3; 1, grade 4; 4, grade 5). Dermatologic and neurologic symptoms were common; intratumoral hemorrhage was confirmed in 3 patients.	10.1093/neuonc/noq141
Everolimus (AFINITOR®)	NCT00789828	0-65 yrs	117	Phase III	Tuberous sclerosis complex + ≥ one lesion with a diameter of 1 cm or greater, and either serial growth of a subependymal giant cell astrocytoma	4.5 mg/m	Daily	-	50% reduction in the volume of subependymal giant cell astrocytomas	Grade 1 or 2: mouth ulceration (25 [32%] in the everolimus group vs two [5%] in the placebo group), stomatitis (24 [31%] vs eight [21%]), convulsion (18 [23%] vs ten [26%]), and pyrexia (17 [22%] vs six [15%])	10.1016/S0140-6736(12)61134-9
	NCT01596140	10-37 yrs	5	Phase I	BRAFV600-mutated brain tumors		BRAF inhibitor vemurafenib in combination with mTOR inhibitor everolimus in a dose-escalation	-	2/5 have PR, 1/5 had SD for 12 motnhts	(descrição de 4 casos)	10.1101/mcs.a005041
	NCT00782626	3.8-17.1 yrs	33	Phase II	Radiographically progressive low-grade glioma	5 mg/m2	Once daily, in 28-day cycles for a planned duration of 12 cycles (48 weeks)	PFS at 2-, 3-, and 5-year were 39 ± 11%, 26 ± 11%, and 26 ± 11%, respectively; two patients died of disease. OS at 2-, 3-, and 5-year was 93 ± 6%.	2/23 had PR, 10/23 had ST and 11/23 had clinical or radiographic prorgressopm;	Grade 1 and 2 toxicities predominated; two definitively related grade 3 toxicities (mucositis and neutropenia) occurred. Grade 4 elevation of liver enzymes was possibly related in one patient.	10.1002/pbc.28787
Gefitinib	-	1-21 yrs	25	Phase I	Refractory solid tumors	150, 300, 400, or 500 mg/m2	Orally	-	1/25 had PR, 8/25 had SD for over 60 weeks. Maximum-tolerated dose was 400 mg/m2/d.	Dose-limiting toxicity was rash in two patients treated with 500 mg/m2 and elevated in ALT and AST in one patient treated with 400 mg/m2	10.1200/JCO.2005.11.429
	-	3-21 yrs	43	Phase II	Untreated nondisseminated diffuse intrinsic brainstem glioma	250 mg/m2	Gefitinib daily+ beam radiotherapy dor 13 month	FSR at 12 and 24 months were 20.9 ±5.6 % and 9.3 ±4%, and OSR at 12 and 24 months were 56.4 ±7.6% and 19.6 ±5.9%	3/43 remain progression-free survivors with ≥36 months follow-up	intratumoral hemorrhage. 4/43 withdrawn from the study for dose-limiting toxicity after receiving therapy for 6, 9, 17, and 24 weeks	10.1093/neuonc/noq199
	NCT00186979	<22 yrs	29	Phase I	Refractory solid tumors: Neuroblastoma, Osteosarcoma, Wilms' tumor, Brain tumor, Ewing sarcoma family of tumors, others	150 or 112.5 mg/m2	IV irinotecan (15 or 20 mg/m(2)) was given daily for 5 days of 2 consecutive weeks. Oral gefitinib (150 or 112.5 mg/m(2)) was concomitantly given daily for 12 or 21 days. A single oral dose of irinotecan was given on day 9 of course 2 to allow pharmacokinetic analysis	-	PR was observed in a patient with refractory Ewing sarcoma.. MTD of the combination regimen was 15 mg/m(2)/d of IV irinotecan for 5 days of 2 consecutive weeks and 112.5 mg/m(2)/d of gefitinib given for 12 days.	Diarrhea was the most common DLT	10.1200/JCO.2008.19.6642
Palbociclib	NCT02255461	4-21 yrs	35	Phase I	Progressive or refractory brain tumors (except low-grade gliomas) with intact retinoblastoma protein	75 mg/m2	Orally starting at 50 mg/m2 daily for the first 21 days of a 28-day course	-	-	Most common AE was myelosuppression. Higher palbociclib exposure was associated with grade 3/4 neutropenia and leukopenia. Dose limiting toxicities included grade 4 neutropenia and grade 3 thrombocytopenia and dehydration.	10.1002/pbc.28879
Pralsetinib	NCT03037385	31–71 yrs	29	Phase I/II	Advanced RET-altered solid tumors	400 mg	Orally once daily	PFS was 7 motnhs and OSR was 14 months	Mediam DoR was 13 months	grade ≥3 treatment-related AEs were neutropenia (31%) and anemia (14%)	10.1038/s41591-022-01931-y
Larotrectinib	NCT02637687 and NCT02576431	1.3-79 yrs	33	Phase I/II	rain cancer with TRK-fusions	100 mg (adult patients) or 100 mg/m2 (pediatric patients; maximum of 100 mg)	BID and continued until disease progression, withdrawal, unacceptable toxicity, or loss of clinical benefit	ORR was 30% (95% confidence interval [CI]: 16-49) for all patients, PFS was 56% (95% CI: 38-74), and OFS was , and 85% (95% CI: 71-99	12 months DoR was 75% (95% CI: 45-100). Median time to response was 1.9 months (range 1.0-3.8 months). Duration of treatment ranged from 1.2-31.3+ months	20 patients had grade 3-4 AE	10.1093/neuonc/noab274
	NCT02122913, NCT02637687 and NCT02576431	1 months - 84 yrs	159	Phase I/II	TRK fusion-positive solid tumors	100 mg twice daily in adutls, aand 100 mg/m2 (maximum of 100 mg) twice daily for pediatric patients.	Orally (capsule or liquid formulation), on a continuous 28-day schedule	-	24/153 had CR	Most common grade 3 or 4 AE were increased alanine aminotransferase (eight [3%] of 260 patients), anaemia (six, 2%), and decreased neutrophil count (five [2%]).Most common serious AE were increased alanine aminotransferase (two [<1%] of 260 patients), increased aspartate aminotransferase (two [<1%]), and nausea (two [<1%])	10.1016/S1470-2045(19)30856-3
Lenvatinib - LENVIMA®	NCT02432274	6-18 yrs	23/31	Phase I/II	Refractory or relapsed solid malignancies/ osteosarcoma	14 mg/m2	Orally once daily on days 1 to 28 of each 28-day cycle	PFS at 4 month by Kaplan-Meier estimate was 37.8% (95% CI 20.0% to 55.4%; full analysis set) and median PFS was 3.0 months (95% CI 1.8-5.4 months).	Best overall response was 6.7% (95% CI 0.8% to 22.1%)	3/23 had dose-limiting toxicities (hypertension, n = 2; increased alanine aminotransferase, n = 1). 60.8% of patients in phase I and 22.6% of patients in phase II (with osteosarcoma) had treatment-related treatment-emergent AE of grade ≥3	10.1016/j.esmoop.2021.100250
Ribociclib (LEE011)	NCT02813135		32	Phase I/II	Sarcomas and Brain tumors	175- 260 mg/m2	260mg/m2 Ribociclib was administered orally once daily for 16 days after TOTEM for 5 days (arm A) or 175 mg/m2 for 21 days with everolimus orally once daily continuously in a 28-day cycle (arm B).	-	2/14 had SD in arm A and 7/18 in arm 2	Main AE were leukopenia, neutropenia, and lymphopenia	10.1200/JCO.21.01152
	NCT01747876	1-21 yrs	32	Phase I	Malignant Rhabdoid Tumors, Neuroblastoma, and Other Solid Tumors	280, 350, or 470 mg/m2	Escalating once-daily oral doses of ribociclib (3-weeks-on/1-week-off)	9/32 had SD, 5/32 had SD over 6, 6 ,8 12 and 13 cycles. Dose-limiting toxicities of grade 3 fatigue (280 mg/m2; n = 1) or grade 4 thrombocytopenia (470 mg/m2; n = 2)	-	Most common treatment-related AE were hematologic: neutropenia (72% all-grade/63% grade 3/4), leukopenia (63%/38%), anemia (44%/3%), thrombocytopenia (44%/28%), and lymphopenia (38%/19%), followed by vomiting (38%/0%), fatigue (25%/3%), nausea (25%/0%), and QTc prolongation (22%/0%)	10.1158/1078-0432.CCR-16-2898
Selpercatinib	NCT03157128	21-85 yrs	45	Phase I/II	Locally advanced/metastatic RET fusion+ solid tumors	160 mg	Orally twice daily	Median PFS was 13.2 months (95% CI: 7.4-26.2), with 34.1% alive and progression-free at a median follow-up of 16.4 monts.	Clinical benefit was observed in 26/41: 2 CR (breast, small intestine), 16PR, and SD ≥16 weeks in 8/41. Median TTR was 1.9 months. Median DoR was 24.5 mo (95% CI: 9.2-NE) with 50% (9/18) of responses ongoing at a median follow-up of 14.9 months	Three grade 5 AEs were observed, 4/41 discontinued treatment.	10.1200/JCO.2022.40.16_suppl.3094
Selumetinib (AZD6244 or ARRY-142886)	NCT01362803	3.5 - 17.4 yrs	50	Phase II	Symptomatic and inoperable plexiform neurofibromas	25 mg per square meter	Every 12 hours in 28-day cycles on a continuous dosing schedule	-	34/50 had PR., 28/50 had durable response ≥1yr. After 1 year of treatment, the mean decrease in child-reported tumor pain-intensity scores was 2 points. 6/50 had disease progression	Five patients discontinued treatment because of toxic effects possibly related to selumetinib. Most comum AE were nausea, vomiting, or diarrhea; an asymptomatic increase in the creatine phosphokinase level; acneiform rash; and paronychia.	10.1056/NEJMoa1912735
	NCT01362803	3 -18.5 yrs	24	Phase I	Neurofibromatosis Type 1–Related Plexiform Neurofibromas	20 to 30 mg per square meter	BID in 28-day cycles	-	MTD was 25mg.	Most commom AE were acneiform rash, gastrointestinal effects, and asymptomatic creatine kinase elevation	10.1056/NEJMoa1605943
	-	3 - 21 yrs	38	Phase I	Recurrent or refractory low-grade glioma	33 mg/m2	10- and 25-mg capsules, was administered orally BID, in 28-day cycles for 26 cycles	PFS at 2-year was 69 ± SE 9.8%.	14/38 had SD.	DLTs included grade 3 elevated amylase/lipase (n = 1), headache (n = 1), mucositis (n = 2), and grades 2–3 rash (n = 6). At dose level 0 (25 mg/m2/dose b.i.d, the RP2D), only 3 of 24 subjects experienced DLTs	10.1093/neuonc/now282
Sirolimus	-	2.3–19 yrs	14	Phase I	Recurrent or refractory solid tumors	10–15 ng/ml	10–15 ng/ml of Sirolimus daily by mouth or nasogastric tube + weekly intravenous vinblastine 4–6 mg/m2/	-	-	1/11 DLT by grade 3 mucositis at the highest vinblastine dose level. Most common AE was myelosuppression	10.1002/pbc.24656
Sorafenib	NCT00908167	<21 yrs	12	Phase I	Pediatric relapsed/refractory leukemia	150-200 mg/m	Sorafenib in combination with clofarabine and cytarabin	-	six patients combination chemotherapy achieved complete remission	2/4 e 1/1 had grade 3 hand-foot skin reaction and/or rash as dose-limiting toxicities (DLTs)	10.1200/JCO.2011.34.7427
	NCT01804374	≥18 yrs	38	Phase II	Progressive and unresectable high-grade osteosarcoma	800 mg sorafenib plus 5 mg everolimus	Sorafenib and everolimus	FRS at 6 month was 17/38 (45%; 95% CI 28-61)	-	6/38 had lymphopenia or hypophosphataemia, 5/38 hand and foot syndrome in five, 4/38 had thrombocytopenia,2/38 had fatigue, oral mucositis, diarrhoea, or anaemia each in two, 1/38 had a grade 3 pneumothorax	10.1016/S1470-2045(14)71136-2
	-	> 14 yrs	35	Phase II	Unresectable high-grade osteosarcoma	400 mg	Sorafenib twice daily	PFS at 4 months was 46% , no progression at 6 month was 29%.	3 (8%) PRs, 2 (6%) minor responses (< 30% tumor shrinkage) and 12 (34%) SDs	Sorafenib was reduced or briefly interrupted in 16 (46%) patients and permanently discontinued in one (3%) case due to toxicity	10.1093/annonc/mdr151
	FINEX pilot study	6-17 yrs	6	Phase I	Refractory or relapsed hepatic tumors (hepatoblastoma or hepatocellular carcinoma)	200 mg/m2 every 12 hours or 400 mg/m2 every 24 hours	Sorafenib and fractionated irinotecan	1/6 survivied 3.9 years, 1/6 survived 1,2 years.	2 patients survived with no evidence of disease, 1 patient was alive with disease and 2 patients Ddied of the disease. Kidney injury biomarkers were found to be elevated at baseline	6/6 had grade 1 or 2 toxicities: anemia, skin toxicity, gastrointestinal symptoms, and hypoalbuminemia, 1/6 had grade 3 transaminase level increase, 3/6 had Grade 3/4 neutropenia, 1/6 had grade 4 transaminase levels increase	10.1002/pbc.28655
	NCT01518413	2-22 yrs	15	Phase I	Relapsed or refractory solid tumors	150 mg/m2	O, BID dosing, was administered with irinotecan; orally, once daily days 1-5, repeated every 21 days	-	Nine of 15 (60%) patients had a best response of SD with four patients receiving ≥6 cycles. 150 mg/m2/dose twice daily with irinotecan 70 mg/m2/dose daily × 5 days every 21 days	Two of three patients at dose level 2 experienced DLT grade 3 diarrhea, and hyponatremia. Dose level 1 was expanded to 12 patients and two patients had DLT, grade 4 thrombocytopenia, grade 3 elevated lipase.	10.1002/pbc.29282
	-	3–18 yrs	13	Phase I	Refractory or recurrent pediatric solid malignancies	150 mg/m2	(1) sorafenib 150 mg/m2 and topotecan 1 mg/m2; (2) sorafenib 150 mg/m2 and topotecan 1.4 mg/m2; and (3) sorafenib 200 mg/m2 and topotecan 1.4 mg/m2	DL2 was the determined MTD.	-	Grade 4 thrombocytopenia delaying therapy for >7 days was observed in one of six patients on DL2, and grade 4 neutropenia that delayed therapy in two of three patients on DL3. A patient with preexisting cardiac failure controlled with medication developed a transient drop in the left ventricular ejection fraction that improved when sorafenib was withheld.	10.1002/cam4.598
	-	7-16 yrs	12	-	Hepatocellular Carcinoma	244–602 mg/m2	PLADO (cisplatin 80 mg/m2/day, doxorubicin 2 × 30 mg/m2/day) in combination with 244–602 mg/m2 /day (median 288) of sorafenib in between chemotherapy cycles, that is, on days 5–21 of each cycle thus 4 days off during PLADO	-	6/12 (50%) patients are in complete remission after a median follow-up of 20 months	The main toxicity attributable to sorafenib was a hand-foot skin reaction (HFSR) in seven patients.	10.1002/pbc.23295
Vandetanib	NCT00923247	≥18 yrs	22	Phase I/II	Locally Advanced or Metastatic Medullary Thyroid Cancer	Initial doses of 1 and 100 (3), 1.3 and 100 (6), 1.3 and 200 (6), and 1.3 and 300 (7)	Escalating doses of intravenous bortezomib or daily oral vandetanib	-	4/22 had PR. There was one dose-limiting toxicity, G3 thrombocytopenia, at bortezomib/vandetanib doses of 1.3/200 in cycle 2 that resolved without intervention. Combination was established as bortezomib, 1.3 mg/m2 IV days 1, 4, 8, and 11 with vandetanib 300 mg p.o. daily	>1/22 had G3 toxicities: hypertension (24%), fatigue (19%), thrombocytopenia (10%), diarrhea (10%), and arthralgia (10%).	10.1634/theoncologist.2018-0452
Vistusertib (AZD2014)	NCT2813135	median age of 14.3 yrs	4	Phase I/II	Relapsed/refractory malignancies	75 mg/m2	75 mg/m2 twice a day (BID) on 2 days/week and vistusertib 30 mg/m2 BID on 3 days/week combined with temozolomide 100 mg/m2/day and topotecan 0.50 mg/m2/day on the first 5 days of each 4-week cycle were safe.	-	-	Main AE were haematological	10.1016/j.ejca.2021.08.010
Vemurafenib (Zelboraf)	NCT01748149	3.3-19.2 yrs	25	Phase I	Recurrent/Refractory BRAF Gene V600E-Mutant Astrocytomas	120-mg and 240- mg	Orarrly, tablets (whole vs crushed), BID in 28-day cycles.	-	96% of the crushed tablet enters the bloodstream compared to the complete tablets.	-	10.1002/jcph.1617
